# Supplementary material
Source: publisher figshare collection journal article supplement (https://tandf.figshare.com/ndownloader/files/40928034)
Supplement: Supplementary file 1 [file 40928034]

**SUPPORTING INFORMATION**

**Design, synthesis, biological evaluation and docking analysis of pyrrolidine-benzenesulfonamides as carbonic anhydrase or acetylcholinesterase inhibitors and antimicrobial agents**

Samet Poyraza, H. Ali Döndaşa,b,* Cem Yamalia, Samet Belverena, Yeliz Demirc, Sabriye Aydınoglud, Naciye Yaktubay Döndaşe, Tugba Taskin-Tokf,g , Senanur Taşb, Mahmut Ülgerh and Jose M. Sansanoi

a Çukurova University, Faculty of Pharmacy, Department of Basic Pharmaceutical Sciences, Adana, Türkiye

b Çukurova University, Institute of Natural and Applied Sciences, Department of Biotechnology, Adana, Türkiye

c Ardahan University, Department of Pharmacy Services, Nihat Delibalta Göle Vocational High School, Ardahan, Türkiye

d Çukurova University, Faculty of Pharmacy, Department of Analytical Chemistry, Adana, Türkiye

e Çukurova University, Faculty of Medicine, Department of Pharmacology, Adana, Türkiye

*fDepartment of Chemistry, Faculty of Arts and Sciences, Gaziantep University, 27310-Gaziantep, Türkiye*

*gDepartment of Bioinformatics and Computational Biology, Institute of Health Sciences, Gaziantep University, 27310-Gaziantep, Türkiye*

h Mersin University, Faculty of Pharmacy, Department of Pharmaceutical Microbiology, Mersin, Türkiye

iUniversity of Alicante, Department of Organic Chemistry, Centro de Innovación en Química Avanzada (ORFEO-CINQA) and Instituto de Síntesis Orgánica (ISO), Alicante, Spain

Corresponding author: adondas@cu.edu.tr

**Table of Contents**

1. 1H and 13C NMR, FTIR, HRMS spectra........................................................................... S1
2. Cartessian coordinates ........................................................................................................ S17
3. Docking figures and tables ................................................................................................. S32
4. IC50 and Ki figures…………………………………………………………………………S38

**1. 1H and 13C NMR, FTIR and HRMS spectra**

1H-NMR (CDCl3) **3b**

13C-NMR (CDCl3) **3b**

IR Spectra **3b**


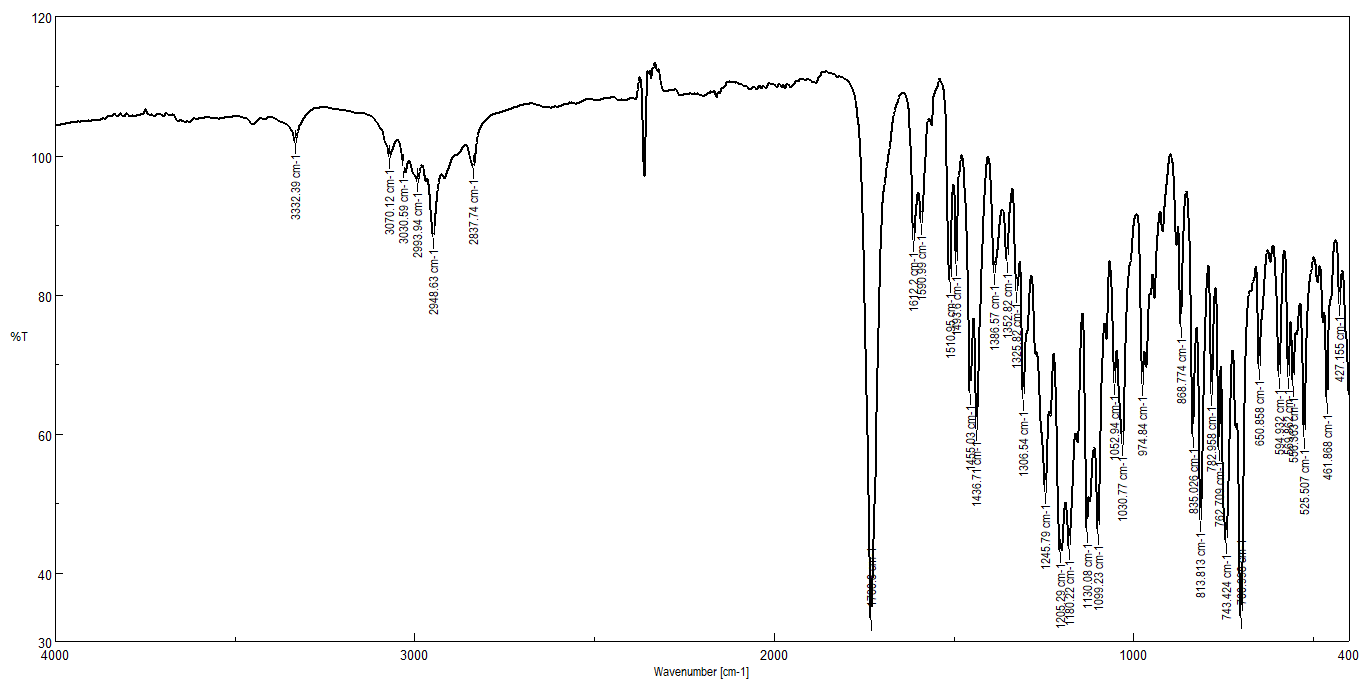


HRMS Spectra **3b**


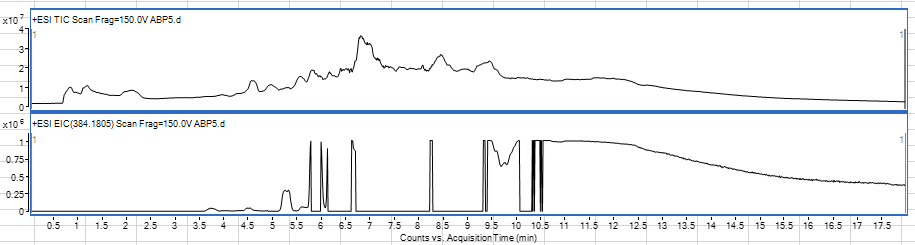


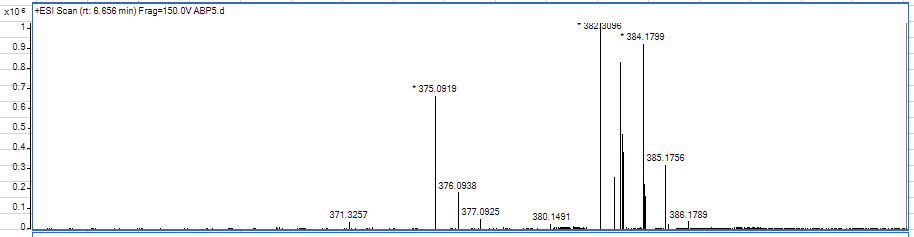


1H-NMR (DMSO-d6) **6a**

13C-NMR (DMSO-d6) **6a**

IR Spectra **6a**


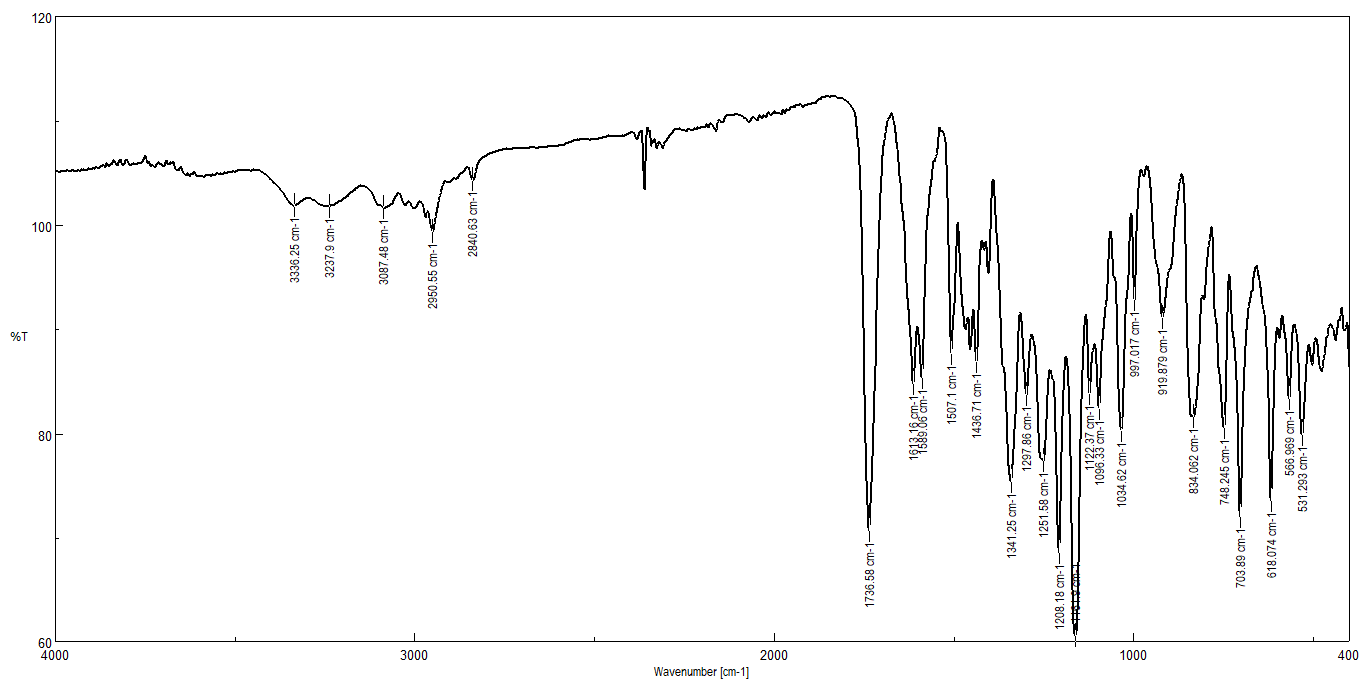


HRMS Spectra **6a**


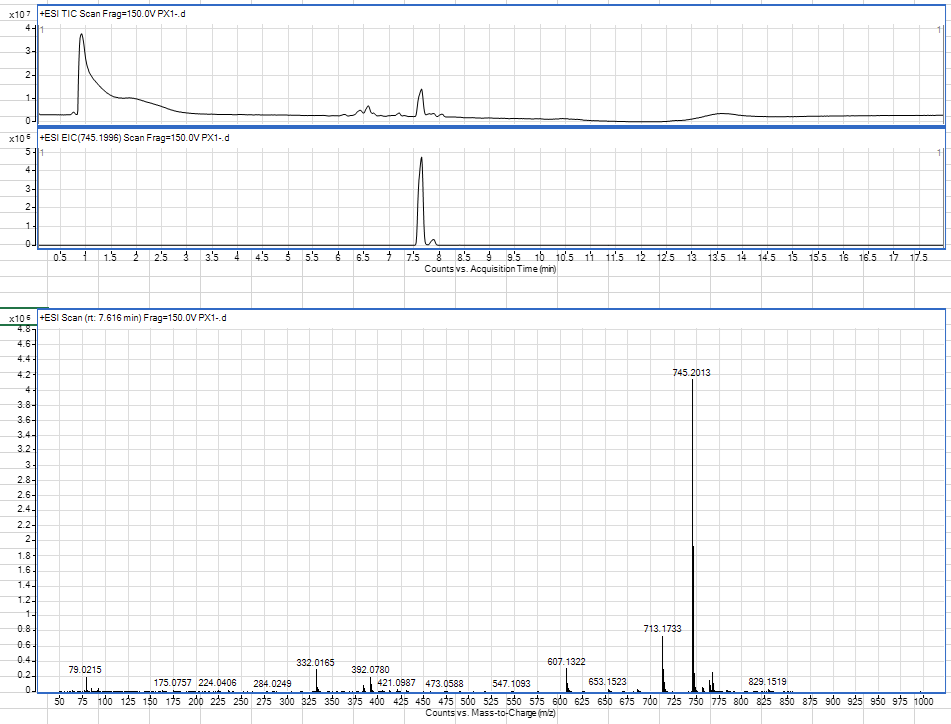


1H-NMR (DMSO-d6) **6b**

13C-NMR (DMSO-d6) **6b**

DEPT (DMSO-d6) **6b**

IR Spectra **6b**


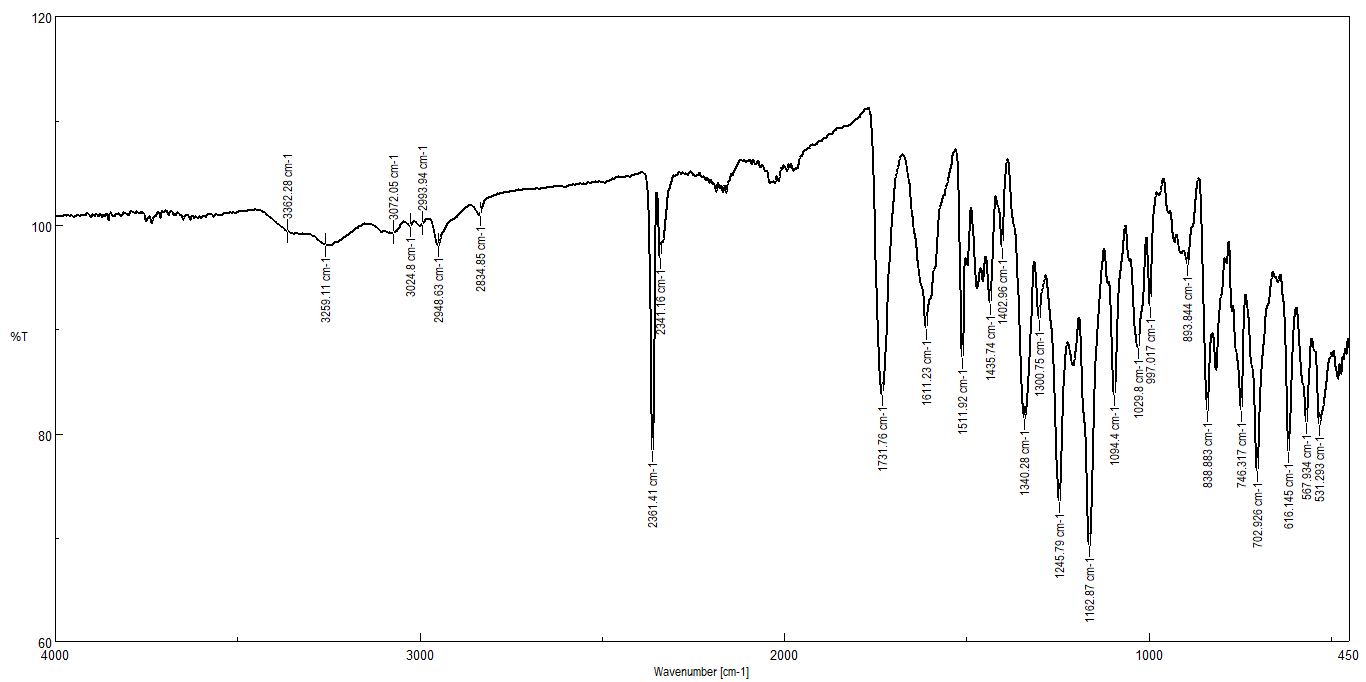


HRMS Spectra **6b**


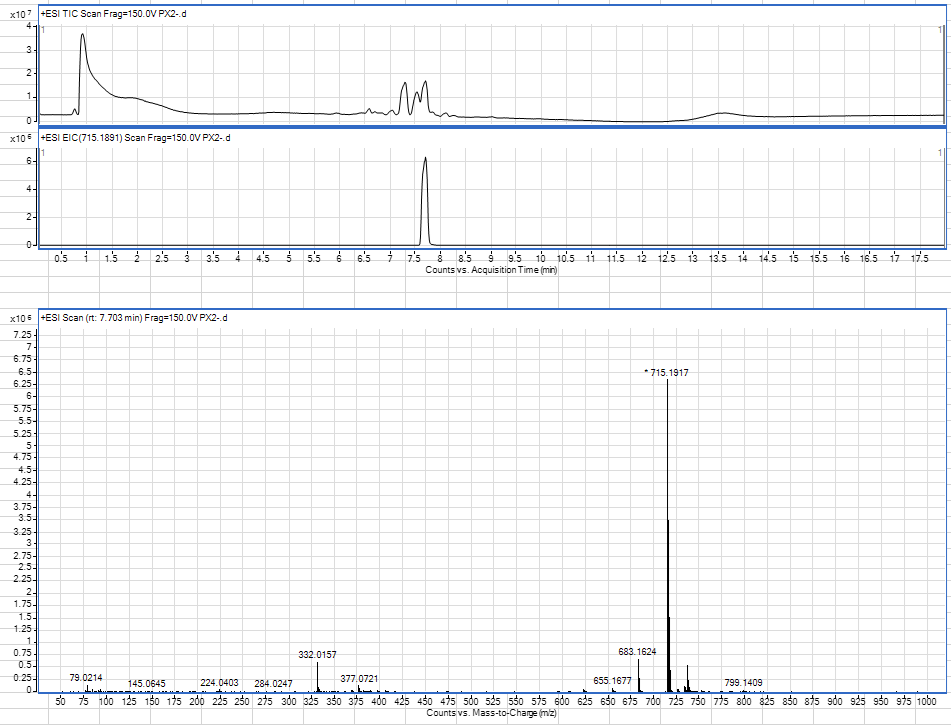


1H-NMR (DMSO-d6) **6c**

13C-NMR (DMSO-d6) **6c**

IR Spectra **6c**


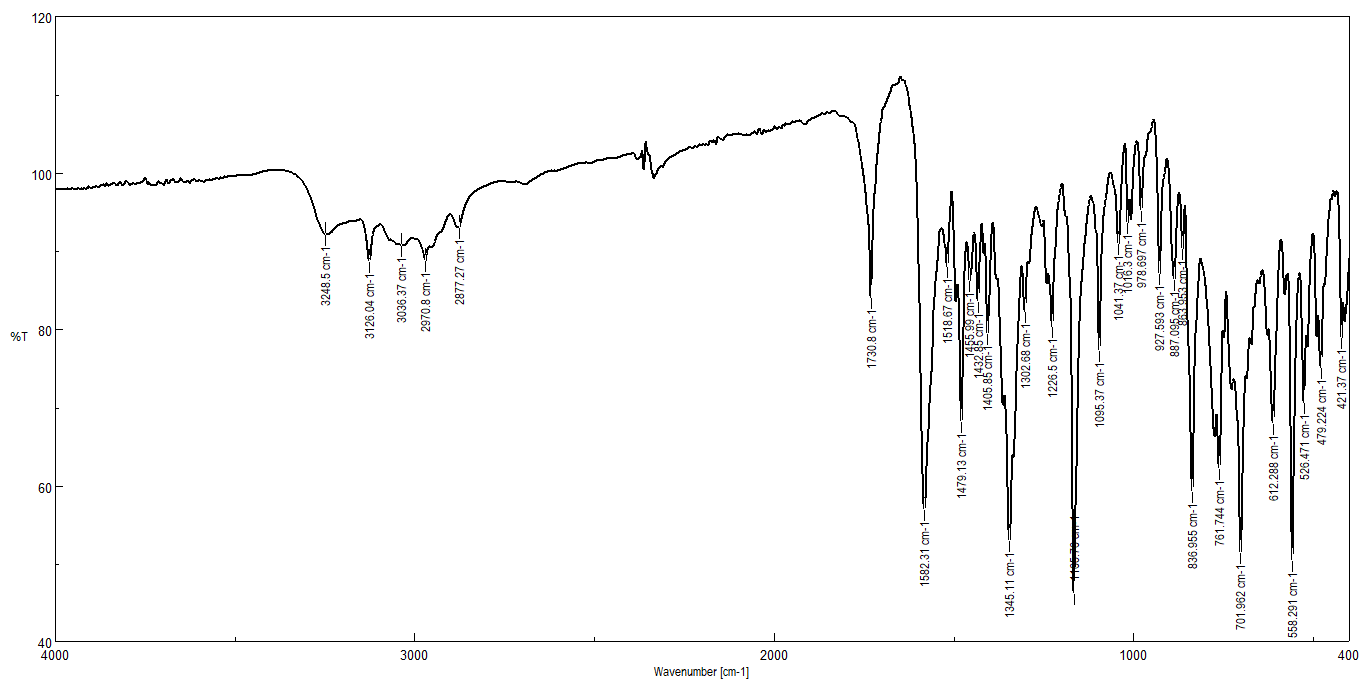


HRMS Spectra **6c**


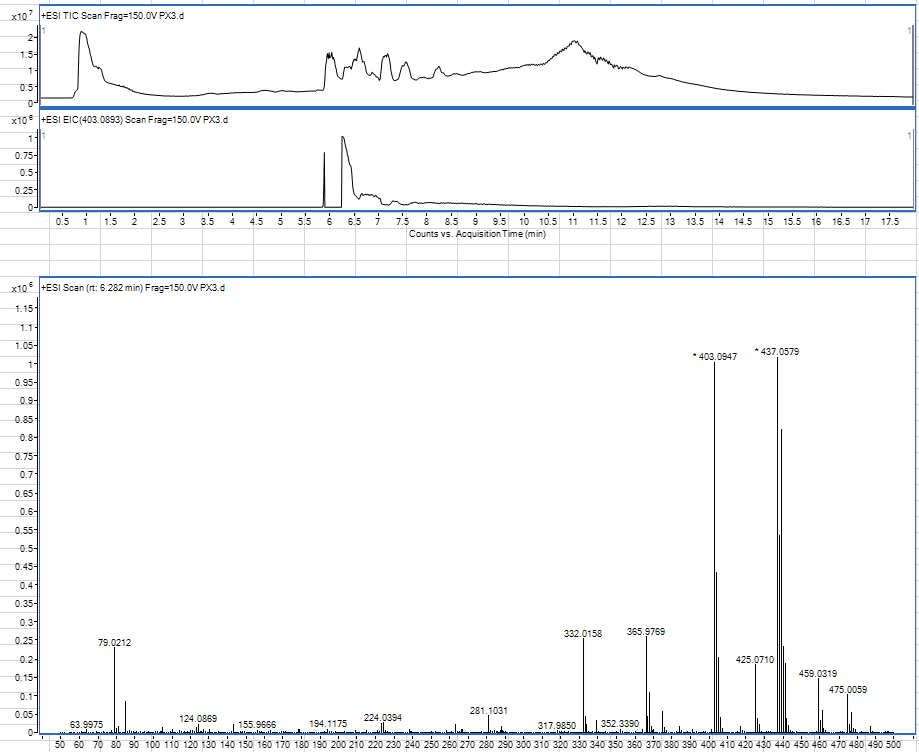


1H NMR (CDCl3) **10b**

13C NMR (CDCl3) **10b**

APT (CDCl3) **10b**

DEPT (CDCl3) **10b**

COSY (CDCl3) **10b**

IR Spectra **10b**


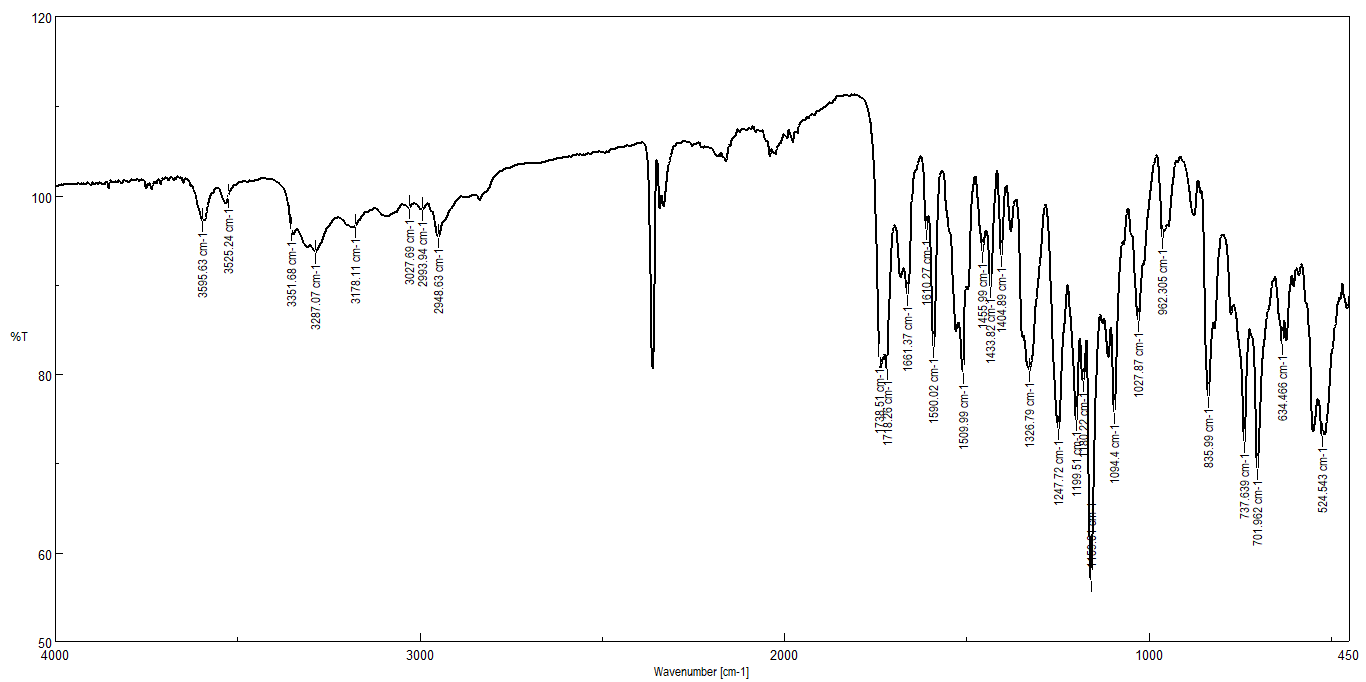


HRMS Spectra **10b**


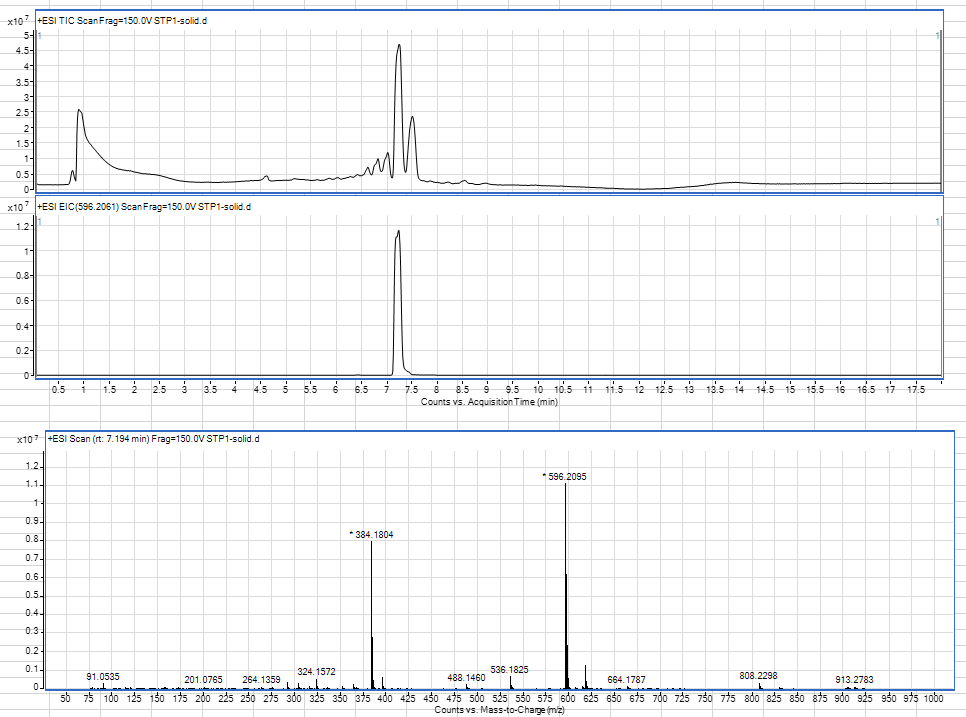


1H NMR (DMSO-d6)**10c**

13C NMR (DMSO-d6) **10c**

APT (DMSO-d6) **10c**

IR Spectra **10c**


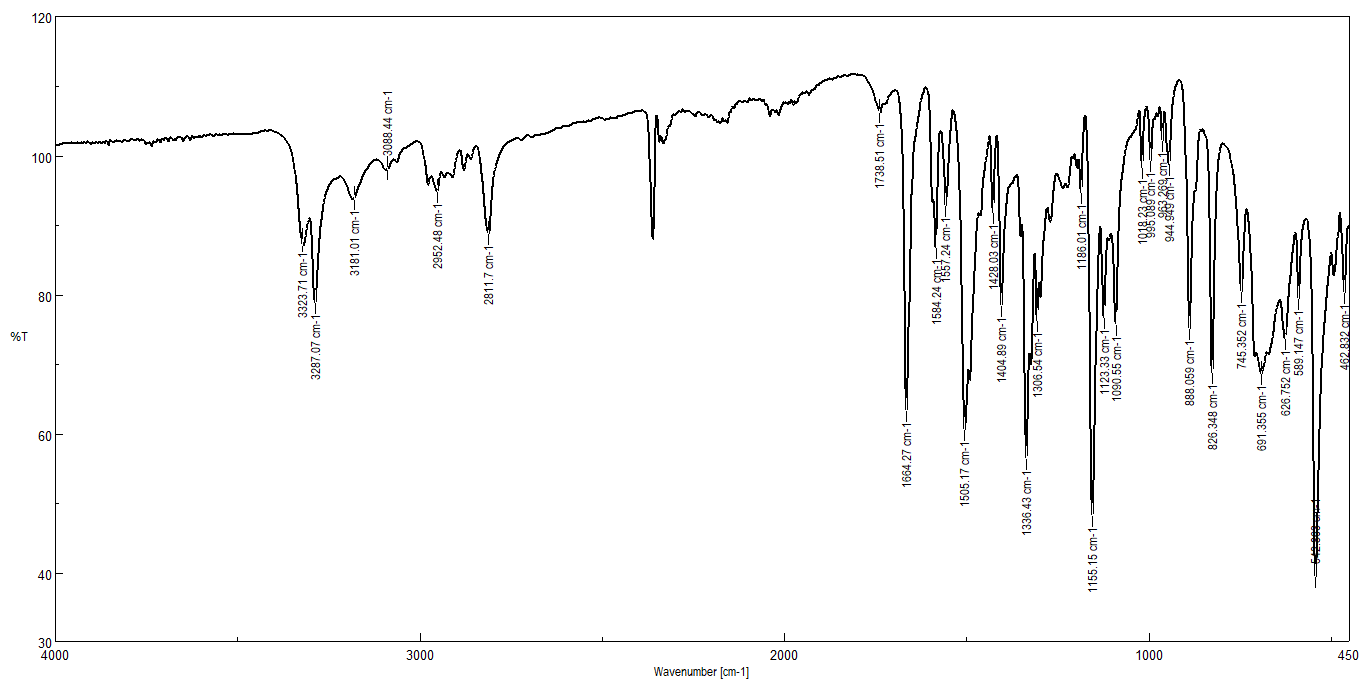


HRMS **10c**


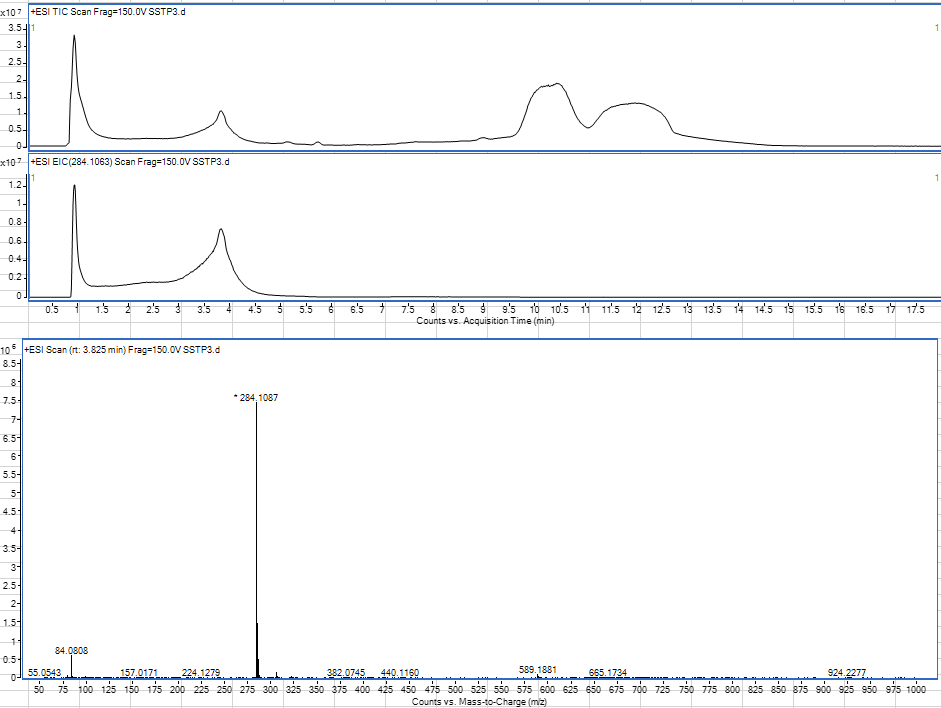


**2. Cartessian coordinates**

**
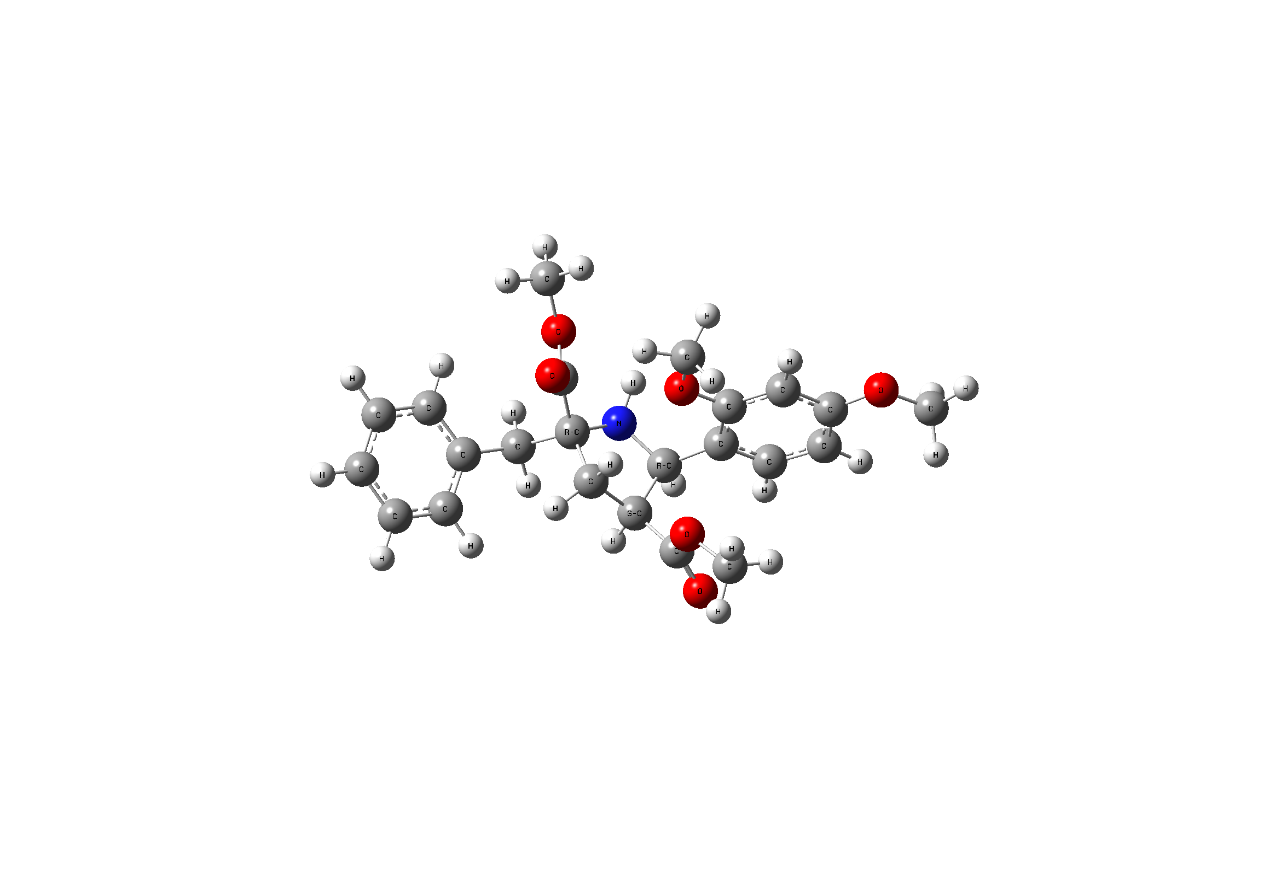
**

**Figure S1.** 3D structure of the optimized compound **3a.**

**Table S1.** The stationary orientations of the compound (**3a**) using the DFT/B3LYP/6-31G* level by using Gaussian 09**.**

Standard orientation:

--------------------------------------------------------------------------------

Center Atomic Atomic Coordinates (Angstroms)

Number Number Type X Y Z

---------------------------------------------------------------------------------

1 6 0 -1.025681 -0.969823 0.280156

2 6 0 0.008580 -1.719191 -0.567334

3 6 0 0.709783 -0.598355 -1.421841

4 7 0 -0.362099 0.392316 -1.591556

5 6 0 -1.474988 0.189907 -0.634706

6 6 0 -2.757490 -0.153706 -1.476214

7 6 0 2.056688 -0.083026 -0.918700

8 6 0 2.245866 0.786779 0.184677

9 6 0 3.524667 1.181946 0.572619

10 6 0 4.653721 0.720675 -0.120146

11 6 0 4.500056 -0.135353 -1.210323

12 6 0 3.206208 -0.509969 -1.584478

13 6 0 1.008694 -2.606298 0.143787

14 8 0 1.562028 -3.550758 -0.380518

15 8 0 1.253956 -2.216246 1.413199

16 6 0 2.263820 -2.971828 2.100057

17 8 0 5.849801 1.175042 0.356159

18 6 0 7.033855 0.744472 -0.296734

19 8 0 1.121309 1.215338 0.830920

20 6 0 1.260248 1.949336 2.041738

21 6 0 -4.051868 -0.342848 -0.715285

22 6 0 -4.867891 0.754711 -0.402738

23 6 0 -6.059646 0.589182 0.302477

24 6 0 -6.463832 -0.684498 0.706745

25 6 0 -5.670135 -1.788537 0.393254

26 6 0 -4.478625 -1.616586 -0.312978

27 1 0 -1.861883 -1.606149 0.581652

28 1 0 -0.568102 -0.571487 1.183408

29 1 0 -0.025358 1.347207 -1.597227

30 1 0 -2.865760 0.646855 -2.214850

31 1 0 -2.514338 -1.062955 -2.038010

32 1 0 3.686265 1.848745 1.409952

33 1 0 5.350698 -0.507109 -1.768498

34 1 0 3.088534 -1.177658 -2.434533

35 1 0 2.311351 -2.550973 3.104974

36 1 0 1.994026 -4.030393 2.137514

37 1 0 3.226610 -2.866912 1.592999

38 1 0 7.859551 1.217966 0.237719

39 1 0 7.147615 -0.346475 -0.247688

40 1 0 7.052882 1.060868 -1.347899

41 1 0 0.244109 2.093563 2.409090

42 1 0 1.847219 1.387124 2.778230

43 1 0 1.736777 2.922969 1.867048

44 1 0 -4.568440 1.748450 -0.727998

45 1 0 -6.676277 1.454738 0.531184

46 1 0 -7.393613 -0.816046 1.253782

47 1 0 -5.981124 -2.786437 0.691766

48 1 0 -3.876969 -2.486241 -0.568466

49 1 0 -0.496954 -2.377916 -1.281178

50 1 0 0.930768 -1.045903 -2.398904

51 6 0 -1.747776 1.456931 0.180442

52 8 0 -1.938507 1.514979 1.375262

53 8 0 -1.796082 2.548391 -0.625554

54 6 0 -2.064865 3.795619 0.034455

55 1 0 -2.118894 4.541458 -0.759271

56 1 0 -3.008958 3.743791 0.582562

57 1 0 -1.261412 4.041497 0.734217

----------------------------------------------------------------------------

**
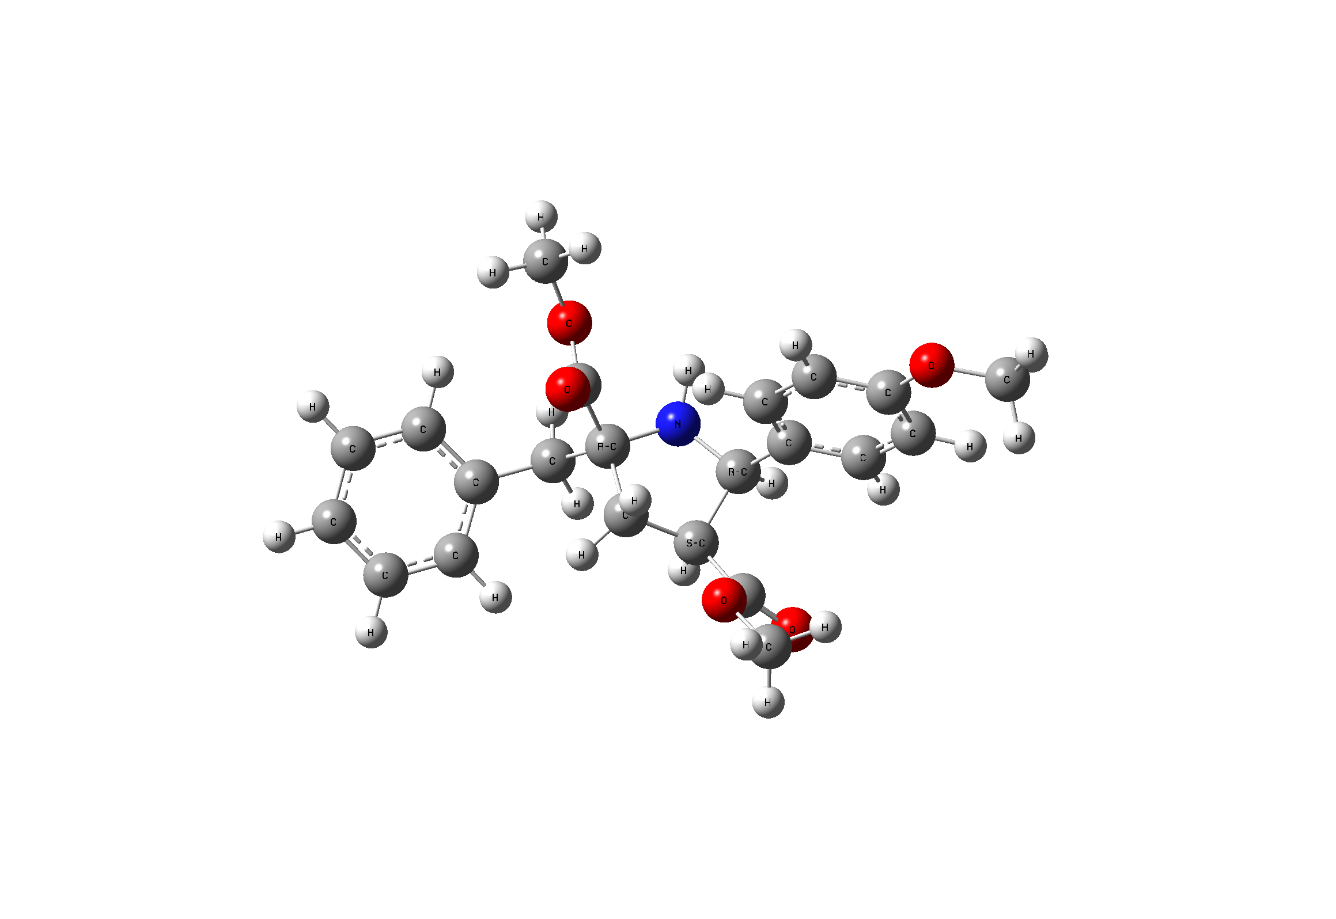
**

**Figure S2.** 3D structure of the optimized compound **3b.**

**Table S2.** The stationary orientations of the compound (**3b**) using the DFT/B3LYP/6-31G* level by using Gaussian 09**.**

Standard orientation:

--------------------------------------------------------------------------------

Center Atomic Atomic Coordinates (Angstroms)

Number Number Type X Y Z

--------------------------------------------------------------------------------

1 6 0 0.839532 0.910061 0.186665

2 6 0 -0.146080 1.599923 -0.763330

3 6 0 -0.842016 0.406983 -1.502971

4 7 0 0.277494 -0.530414 -1.636381

5 6 0 1.341175 -0.302857 -0.625983

6 6 0 2.680611 -0.027357 -1.388035

7 6 0 -2.104992 -0.129699 -0.834741

8 6 0 -2.089086 -1.017747 0.254386

9 6 0 -3.269142 -1.471090 0.830984

10 6 0 -4.509892 -1.046505 0.334761

11 6 0 -4.548785 -0.160236 -0.747002

12 6 0 -3.352050 0.281527 -1.316550

13 6 0 -1.147060 2.576772 -0.180819

14 8 0 -1.818697 3.327642 -0.858226

15 8 0 -1.230973 2.510225 1.162594

16 6 0 -2.216944 3.367668 1.760554

17 8 0 -5.609154 -1.552910 0.968106

18 6 0 -6.889789 -1.157194 0.505132

19 6 0 3.912641 0.192029 -0.534639

20 6 0 4.688584 -0.890889 -0.094122

21 6 0 5.818780 -0.690923 0.698930

22 6 0 6.200657 0.601132 1.064065

23 6 0 5.447486 1.690054 0.623258

24 6 0 4.317752 1.484370 -0.169807

25 1 0 1.655346 1.564103 0.503469

26 1 0 0.331637 0.568288 1.089406

27 1 0 0.003785 -1.500692 -1.740015

28 1 0 2.837112 -0.868608 -2.070085

29 1 0 2.495421 0.852043 -2.015133

30 1 0 -3.254345 -2.156371 1.672983

31 1 0 -5.491541 0.183900 -1.157050

32 1 0 -3.395580 0.971979 -2.155309

33 1 0 -2.138447 3.197536 2.834609

34 1 0 -2.013543 4.414082 1.518454

35 1 0 -3.215111 3.105574 1.400519

36 1 0 -7.611285 -1.668346 1.145334

37 1 0 -7.033902 -0.071908 0.591716

38 1 0 -7.053856 -1.458714 -0.538073

39 1 0 4.407974 -1.899086 -0.387961

40 1 0 6.405953 -1.545201 1.026321

41 1 0 7.082659 0.758246 1.679153

42 1 0 5.742573 2.701617 0.889997

43 1 0 3.749262 2.341498 -0.524413

44 1 0 0.398941 2.162564 -1.530252

45 1 0 -1.137038 0.756611 -2.499935

46 6 0 1.483545 -1.544897 0.266450

47 8 0 1.302865 -1.599256 1.463366

48 8 0 1.799575 -2.635167 -0.476973

49 6 0 1.901947 -3.871343 0.252280

50 1 0 2.152731 -4.628638 -0.490981

51 1 0 2.683745 -3.801324 1.012702

52 1 0 0.952691 -4.109059 0.739430

53 1 0 -1.147812 -1.360151 0.672040

----------------------------------------------------------------------------

**
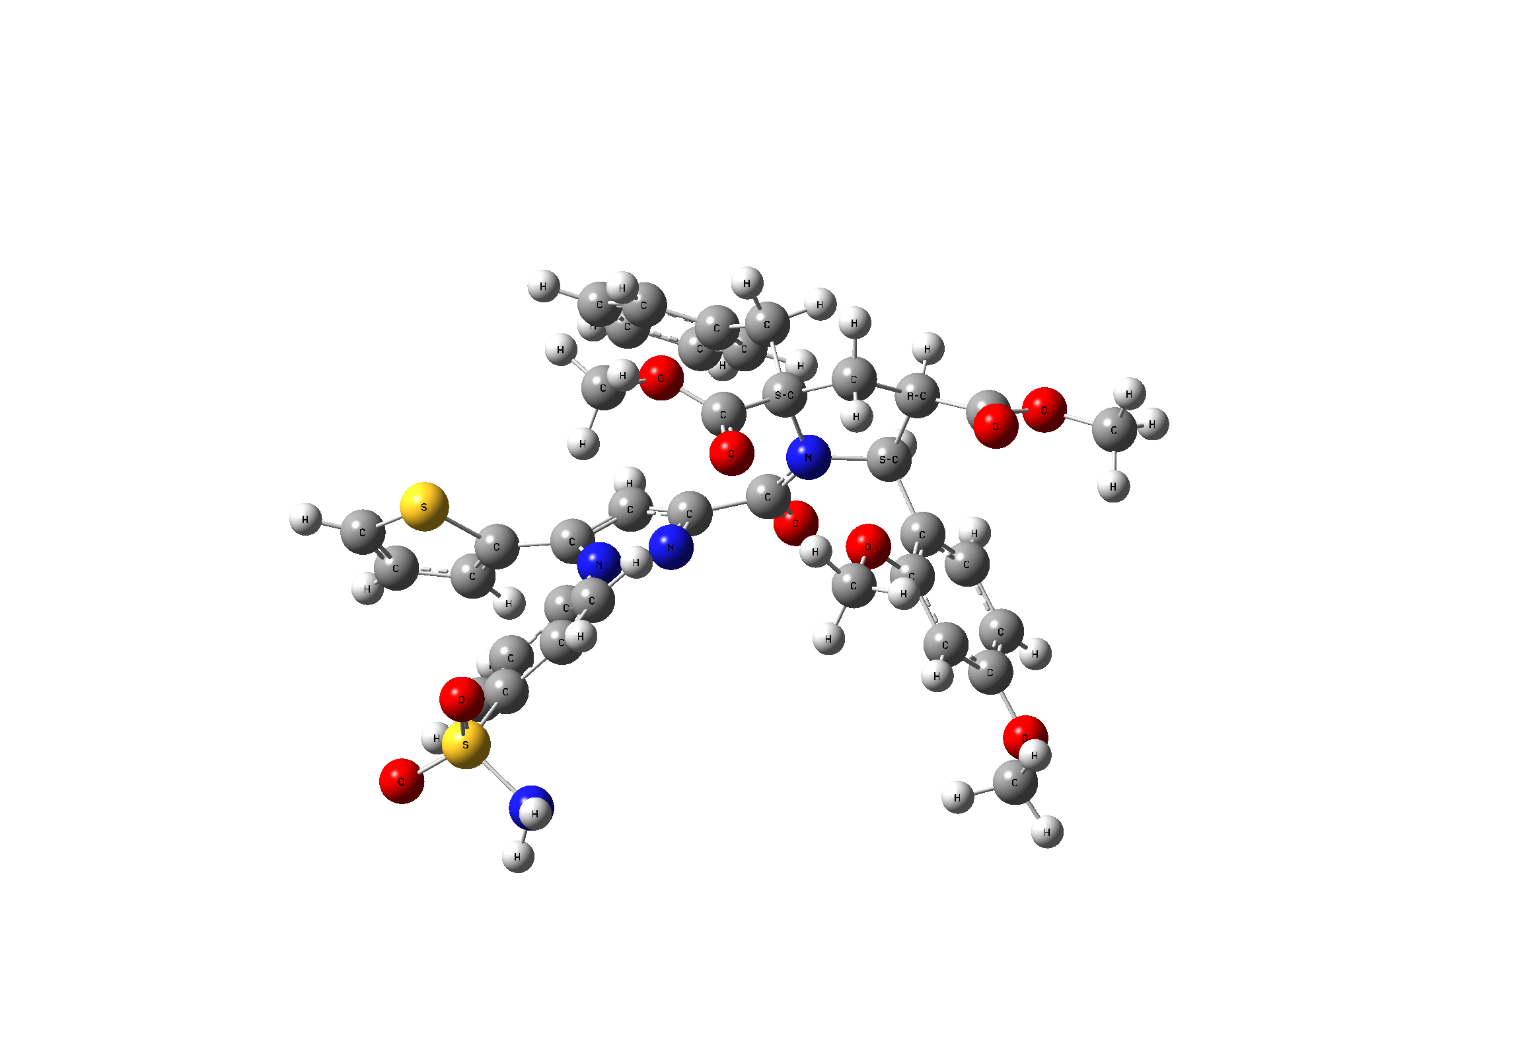
**

**Figure S3.** 3D structure of the optimized compound **6a.**

**Table S3.** The stationary orientations of the compound (**6a**) using the DFT/B3LYP/6-31G* level by using Gaussian 09**.**

Standard orientation:

--------------------------------------------------------------------------------

Center Atomic Atomic Coordinates (Angstroms)

Number Number Type X Y Z

--------------------------------------------------------------------------------

1 6 0 5.640508 3.561389 1.455824

2 6 0 5.085631 3.544546 2.705685

3 6 0 3.830037 2.869125 2.741944

4 6 0 3.441709 2.369383 1.521454

5 16 0 4.633300 2.760788 0.294151

6 6 0 2.174528 1.712621 1.206133

7 7 0 2.021267 0.484107 0.575174

8 7 0 0.712632 0.202228 0.345790

9 6 0 0.034841 1.235643 0.835406

10 6 0 0.898498 2.201972 1.399255

11 6 0 2.973756 -0.523208 0.262288

12 6 0 2.692302 -1.402050 -0.796885

13 6 0 3.597484 -2.405917 -1.117161

14 6 0 4.776611 -2.535048 -0.378048

15 6 0 5.056868 -1.672922 0.680056

16 6 0 4.147870 -0.669066 1.009517

17 6 0 -1.457091 1.180771 0.952129

18 8 0 -1.958354 1.302055 2.066241

19 7 0 -2.221833 0.886452 -0.157318

20 6 0 -3.638484 0.515038 0.116073

21 6 0 -4.313999 0.605737 -1.296551

22 6 0 -1.999934 1.311936 -1.560964

23 6 0 -3.795608 -0.794520 0.873926

24 6 0 -4.568285 -0.812000 2.039547

25 6 0 -4.790302 -1.969786 2.774327

26 6 0 -4.209028 -3.167352 2.345455

27 6 0 -3.418900 -3.191530 1.190519

28 6 0 -3.215328 -2.010641 0.461319

29 16 0 5.951693 -3.814415 -0.806307

30 8 0 5.976741 -3.956650 -2.264941

31 8 0 7.172297 -3.568775 -0.030085

32 7 0 5.200004 -5.227774 -0.232223

33 6 0 -0.680598 0.777480 -2.179119

34 8 0 -0.467729 -0.382988 -2.451967

35 8 0 0.173498 1.771092 -2.491954

36 6 0 1.372525 1.379111 -3.181694

37 6 0 -5.352482 -0.473594 -1.549011

38 8 0 -5.226119 -1.430510 -2.280293

39 8 0 -6.472930 -0.213730 -0.839941

40 6 0 -7.502330 -1.213005 -0.924652

41 8 0 -2.460023 -1.961794 -0.665595

42 6 0 -1.821022 -3.135625 -1.139687

43 8 0 -4.465447 -4.265457 3.116672

44 6 0 -3.879079 -5.502609 2.750506

45 1 0 6.584765 3.989448 1.146404

46 1 0 5.556356 3.990192 3.575096

47 1 0 3.232165 2.741575 3.637820

48 1 0 0.629565 3.154612 1.828626

49 1 0 1.764438 -1.293284 -1.346803

50 1 0 3.396341 -3.078197 -1.944478

51 1 0 5.977260 -1.788579 1.241559

52 1 0 4.349847 -0.013267 1.846992

53 1 0 -5.001628 0.122423 2.386023

54 1 0 -5.388485 -1.965659 3.679053

55 1 0 -2.966478 -4.113497 0.854059

56 1 0 5.319311 -5.956565 -0.934190

57 1 0 5.617683 -5.509772 0.653087

58 1 0 1.869600 2.310671 -3.453732

59 1 0 2.012715 0.784759 -2.526883

60 1 0 1.127705 0.795477 -4.072559

61 1 0 -8.323556 -0.839243 -0.312494

62 1 0 -7.823398 -1.347722 -1.960867

63 1 0 -7.137128 -2.166565 -0.534622

64 1 0 -1.248461 -2.815648 -2.009551

65 1 0 -1.138941 -3.549198 -0.385620

66 1 0 -2.554073 -3.899153 -1.431241

67 1 0 -4.203349 -6.222548 3.504532

68 1 0 -4.220908 -5.837509 1.761740

69 1 0 -2.782241 -5.447075 2.751794

70 1 0 -4.075900 1.283378 0.759884

71 6 0 -3.157871 0.587162 -2.295240

72 1 0 -4.849658 1.560143 -1.340124

73 1 0 -2.873583 -0.441392 -2.506867

74 1 0 -3.404500 1.088623 -3.236634

75 6 0 -2.198270 2.859857 -1.764876

76 6 0 -1.498162 3.862418 -0.866146

77 6 0 -0.338923 4.535122 -1.279906

78 6 0 0.249464 5.514029 -0.479660

79 6 0 -0.312161 5.843366 0.755987

80 6 0 -1.470614 5.189604 1.178748

81 6 0 -2.059402 4.215811 0.370083

82 1 0 -1.953132 3.074984 -2.809823

83 1 0 -3.275608 3.034606 -1.664370

84 1 0 0.100471 4.289184 -2.240907

85 1 0 1.145087 6.024615 -0.824171

86 1 0 0.143245 6.609466 1.378109

87 1 0 -1.925092 5.441926 2.133093

88 1 0 -2.968840 3.726315 0.708000

----------------------------------------------------------------------------

**
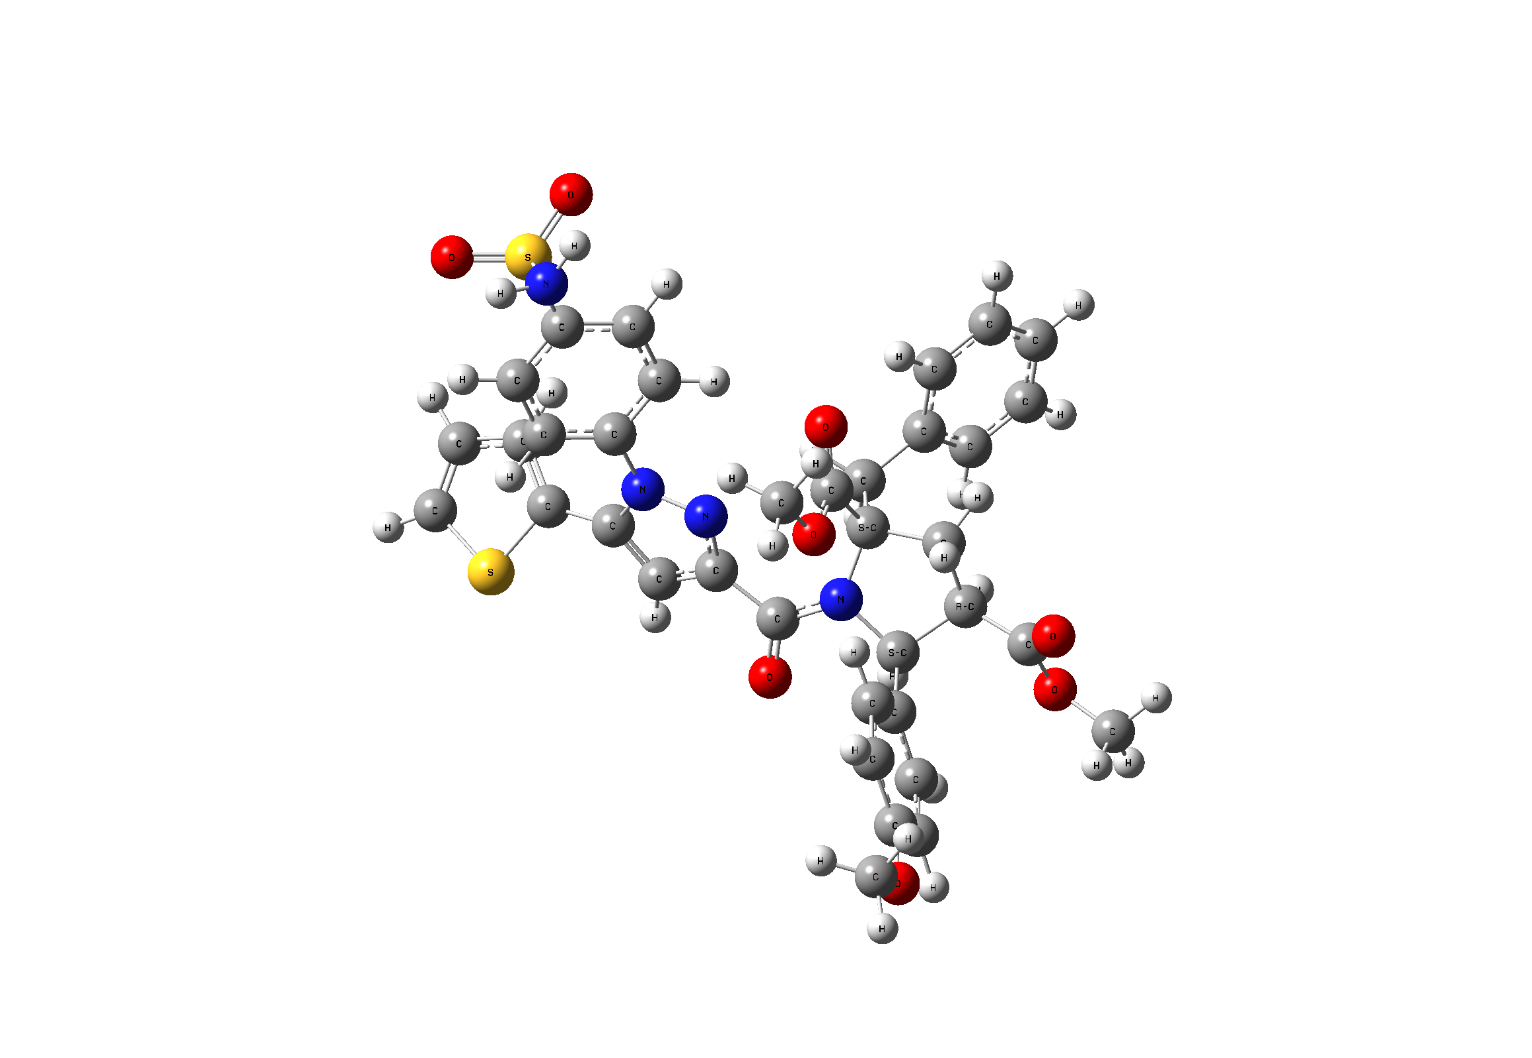
**

**Figure S4.** 3D structure of the optimized compound **6b.**

**Table S4.** The stationary orientations of the compound (**6b**) using the DFT/B3LYP/6-31G* level by using Gaussian 09**.**

Standard orientation:

--------------------------------------------------------------------------------

Center Atomic Atomic Coordinates (Angstroms)

Number Number Type X Y Z

--------------------------------------------------------------------------------

1 6 0 -5.104320 3.104498 4.259624

2 6 0 -5.525140 1.850581 3.908337

3 6 0 -4.593955 1.168607 3.073850

4 6 0 -3.470685 1.912100 2.791205

5 16 0 -3.561980 3.480692 3.566581

6 6 0 -2.278782 1.546860 2.035159

7 7 0 -2.273760 0.815834 0.856263

8 7 0 -1.012377 0.536987 0.443550

9 6 0 -0.210204 1.103963 1.342147

10 6 0 -0.950298 1.758445 2.351501

11 6 0 -3.359005 0.428910 0.017513

12 6 0 -3.320083 -0.827800 -0.599429

13 6 0 -4.361176 -1.211669 -1.439893

14 6 0 -5.429894 -0.339510 -1.654056

15 6 0 -5.471637 0.914309 -1.044048

16 6 0 -4.425500 1.305377 -0.212246

17 6 0 1.282282 1.115608 1.302856

18 8 0 1.854089 2.002062 1.936711

19 7 0 2.003272 0.176536 0.594252

20 6 0 3.479649 0.287200 0.741620

21 6 0 3.960497 -1.173361 0.465266

22 6 0 2.879163 -1.749835 -0.441067

23 6 0 1.559512 -1.168676 0.136425

24 6 0 4.110038 1.359548 -0.135444

25 6 0 5.229745 2.055035 0.348091

26 6 0 5.879998 3.005466 -0.426985

27 6 0 5.413905 3.295519 -1.717380

28 6 0 4.289656 2.624460 -2.208721

29 6 0 3.650927 1.664811 -1.417621

30 16 0 -6.775817 -0.840294 -2.726623

31 8 0 -7.923683 0.020020 -2.422891

32 8 0 -6.857239 -2.303057 -2.689370

33 7 0 -6.219860 -0.427711 -4.278745

34 6 0 0.558178 -1.139910 -1.031877

35 8 0 -0.271008 -2.005775 -1.229511

36 8 0 0.788714 -0.131821 -1.885932

37 6 0 -0.088312 -0.070380 -3.023564

38 6 0 5.351591 -1.260983 -0.134212

39 8 0 5.606391 -1.510647 -1.291190

40 8 0 6.290035 -1.022097 0.808117

41 6 0 7.647447 -1.004450 0.332493

42 8 0 6.116593 4.247217 -2.401636

43 6 0 5.682576 4.590599 -3.706670

44 1 0 -5.607982 3.830865 4.883290

45 1 0 -6.463957 1.419936 4.238659

46 1 0 -4.740319 0.158419 2.709000

47 1 0 -0.553216 2.273952 3.212039

48 1 0 -2.473638 -1.484047 -0.434731

49 1 0 -4.352744 -2.189486 -1.909101

50 1 0 -6.314607 1.573955 -1.217701

51 1 0 -4.437115 2.284395 0.251319

52 1 0 2.865250 -2.839869 -0.461350

53 1 0 3.039053 -1.392102 -1.461357

54 1 0 5.593131 1.849825 1.351778

55 1 0 6.740593 3.549543 -0.050098

56 1 0 3.901257 2.837971 -3.198218

57 1 0 2.769288 1.165110 -1.803961

58 1 0 -6.805570 0.311058 -4.663478

59 1 0 -6.246399 -1.257554 -4.868346

60 1 0 -1.115650 0.096226 -2.692089

61 1 0 0.265221 0.773389 -3.616382

62 1 0 -0.035842 -0.997560 -3.599574

63 1 0 8.264488 -0.841319 1.216595

64 1 0 7.899277 -1.955154 -0.143965

65 1 0 7.784129 -0.193112 -0.387110

66 1 0 6.375773 5.355631 -4.061871

67 1 0 5.717068 3.727821 -4.385450

68 1 0 4.663783 5.000895 -3.699454

69 1 0 3.978908 -1.709279 1.420502

70 1 0 3.694418 0.553569 1.779138

71 6 0 0.974690 -2.005806 1.339101

72 6 0 1.313064 -3.484017 1.416938

73 6 0 0.732315 -4.430514 0.557793

74 6 0 1.047276 -5.784525 0.673250

75 6 0 1.944655 -6.222978 1.649788

76 6 0 2.523945 -5.294464 2.514198

77 6 0 2.207919 -3.939452 2.396361

78 1 0 1.337753 -1.529720 2.254797

79 1 0 -0.110672 -1.879859 1.331091

80 1 0 0.038684 -4.092669 -0.204698

81 1 0 0.585735 -6.501270 -0.001374

82 1 0 2.185961 -7.278939 1.738173

83 1 0 3.217946 -5.621772 3.284107

84 1 0 2.652461 -3.225354 3.087046

-----------------------------------------------------------------------------

**
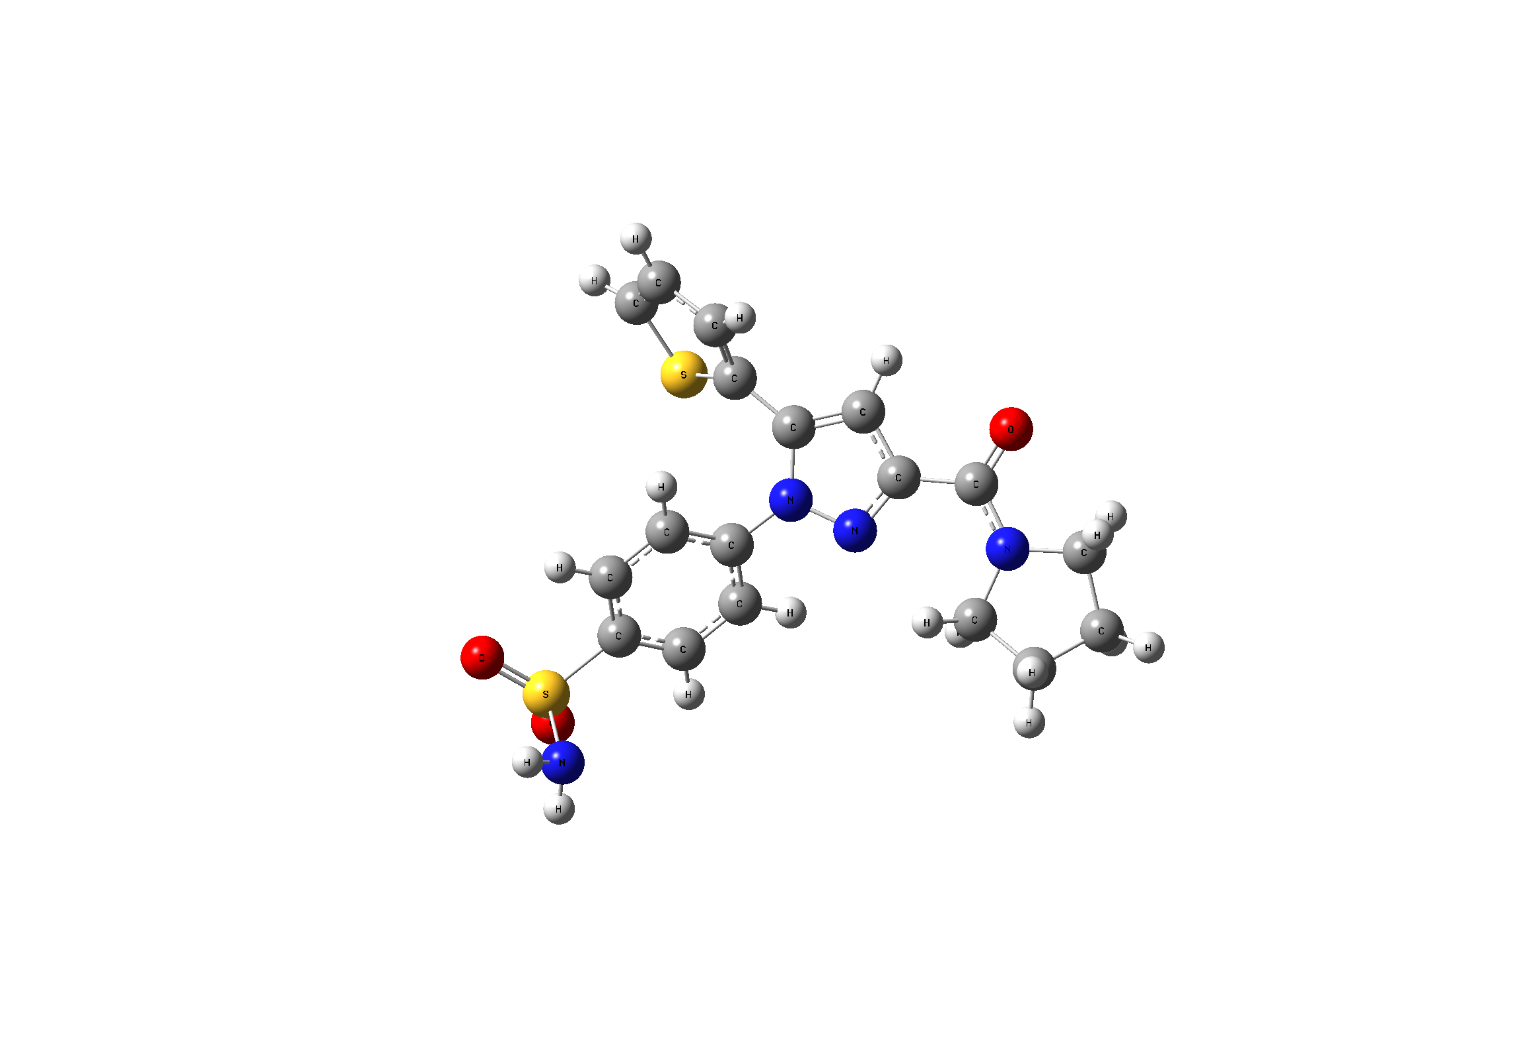
**

**Figure S5.** 3D structure of the optimized compound **6c.**

**Table S5.** The stationary orientations of the compound (**6c**) using the DFT/B3LYP/6-31G* level by using Gaussian 09**.**

Standard orientation:

--------------------------------------------------------------------------------

Center Atomic Atomic Coordinates (Angstroms)

Number Number Type X Y Z

--------------------------------------------------------------------------------

1 6 0 -1.570487 4.842320 -0.427374

2 6 0 -0.859092 5.113274 0.709080

3 6 0 0.086001 4.093251 1.022185

4 6 0 0.082119 3.049761 0.125967

5 16 0 -1.092621 3.339088 -1.144171

6 6 0 0.992362 1.907347 0.117350

7 7 0 0.622368 0.574883 0.000975

8 7 0 1.699593 -0.246861 -0.045089

9 6 0 2.760886 0.555205 0.057511

10 6 0 2.371987 1.910609 0.158446

11 6 0 -0.670846 -0.016371 -0.001388

12 6 0 -0.903558 -1.120571 -0.831588

13 6 0 -2.150621 -1.734091 -0.831215

14 6 0 -3.158160 -1.238215 -0.000237

15 6 0 -2.935371 -0.136712 0.824628

16 6 0 -1.682311 0.472419 0.831836

17 6 0 4.192119 0.124346 0.041451

18 8 0 5.066098 0.996503 0.047480

19 7 0 4.511873 -1.198555 0.013978

20 6 0 5.935769 -1.570419 -0.046774

21 6 0 5.904470 -3.084667 -0.290770

22 6 0 4.600507 -3.524004 0.393822

23 6 0 3.629438 -2.376532 0.077842

24 16 0 -4.769528 -2.021392 -0.005042

25 8 0 -5.008402 -2.559079 -1.347343

26 8 0 -5.705736 -1.102657 0.650559

27 7 0 -4.551687 -3.370410 1.005449

28 1 0 -2.353455 5.431708 -0.885785

29 1 0 -1.006046 6.004708 1.308806

30 1 0 0.744282 4.117029 1.883860

31 1 0 3.026560 2.766420 0.206625

32 1 0 -0.103605 -1.482633 -1.466426

33 1 0 -2.349567 -2.576560 -1.484795

34 1 0 -3.735573 0.239153 1.452465

35 1 0 -1.491666 1.317785 1.482386

36 1 0 6.429993 -1.314792 0.900023

37 1 0 6.439435 -1.003772 -0.834663

38 1 0 6.791641 -3.587922 0.104807

39 1 0 5.853605 -3.292621 -1.366571

40 1 0 4.750788 -3.597163 1.477963

41 1 0 4.226636 -4.490368 0.041834

42 1 0 2.852933 -2.246525 0.833210

43 1 0 3.123437 -2.533201 -0.883995

44 1 0 -4.893866 -4.197587 0.519695

45 1 0 -5.053107 -3.230018 1.880579

------------------------------------------------------------------------------

**
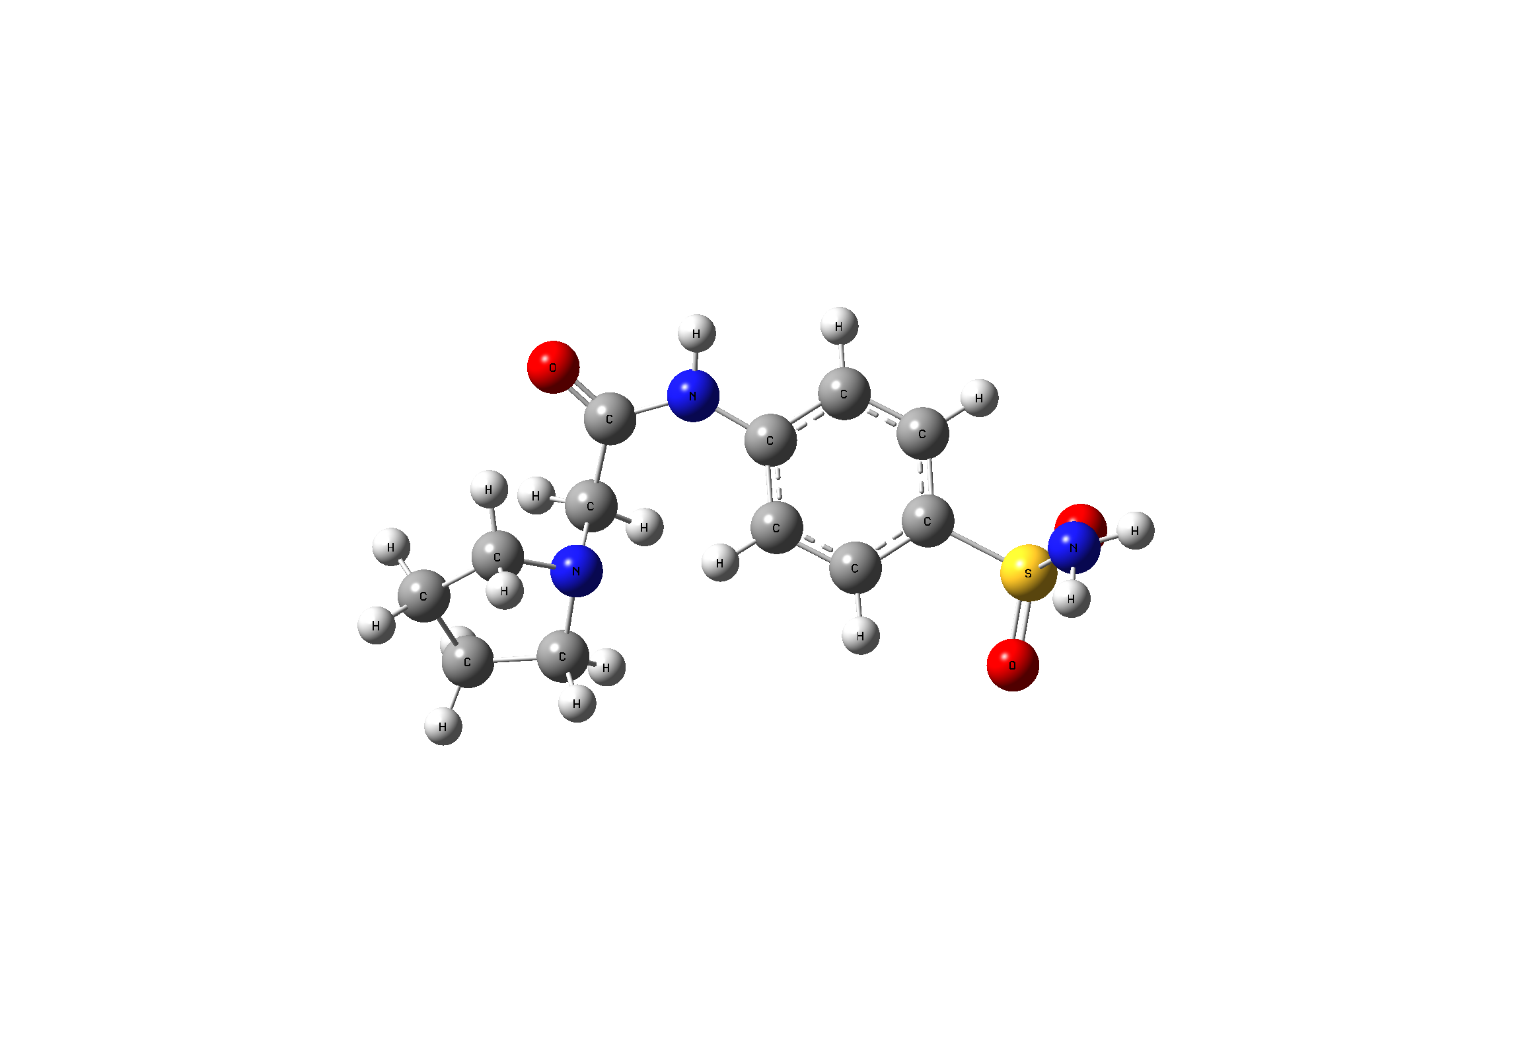
**

**Figure S6.** 3D structure of the optimized compound **10c.**

**Table S6.** The stationary orientations of the compound (**10c**) using the DFT/B3LYP/6-31G* level by using Gaussian 09**.**

Standard orientation:

--------------------------------------------------------------------------------

Center Atomic Atomic Coordinates (Angstroms)

Number Number Type X Y Z

--------------------------------------------------------------------------------

1 6 0 -4.224589 -0.436499 1.060771

2 7 0 -2.984024 -0.659684 0.285762

3 6 0 -3.197707 -1.998168 -0.300763

4 6 0 -4.694963 -2.083738 -0.697120

5 6 0 -5.387750 -1.052418 0.235520

6 6 0 -2.752700 0.361513 -0.749824

7 6 0 -2.454874 1.730976 -0.140797

8 7 0 -1.145552 2.093330 0.130263

9 8 0 -3.349627 2.538863 0.072670

10 6 0 0.074460 1.393889 0.063825

11 6 0 1.235492 2.125059 -0.247496

12 6 0 2.472531 1.496998 -0.295040

13 6 0 2.553658 0.125987 -0.036580

14 6 0 1.411235 -0.610949 0.273236

15 6 0 0.171602 0.021904 0.339959

16 16 0 4.141360 -0.691551 -0.111772

17 8 0 4.960300 -0.019673 -1.125388

18 8 0 3.890889 -2.136809 -0.145716

19 7 0 4.856009 -0.293902 1.380466

20 1 0 -4.359735 0.624603 1.275820

21 1 0 -4.114954 -0.966177 2.014984

22 1 0 -2.973039 -2.740254 0.475768

23 1 0 -2.508101 -2.171179 -1.132543

24 1 0 -5.084864 -3.098396 -0.568960

25 1 0 -4.837453 -1.818149 -1.749968

26 1 0 -6.135373 -1.514865 0.887458

27 1 0 -5.903273 -0.281963 -0.346397

28 1 0 -1.911703 0.028917 -1.366528

29 1 0 -3.618076 0.525545 -1.411034

30 1 0 -1.087805 3.070795 0.396369

31 1 0 1.157786 3.186260 -0.469398

32 1 0 3.365199 2.056734 -0.553089

33 1 0 1.495178 -1.674539 0.469384

34 1 0 -0.719220 -0.527860 0.630428

35 1 0 5.822810 -0.024062 1.205894

36 1 0 4.814962 -1.095173 2.008066

----------------------------------------------------------------------------

**3. Docking figures and tables**


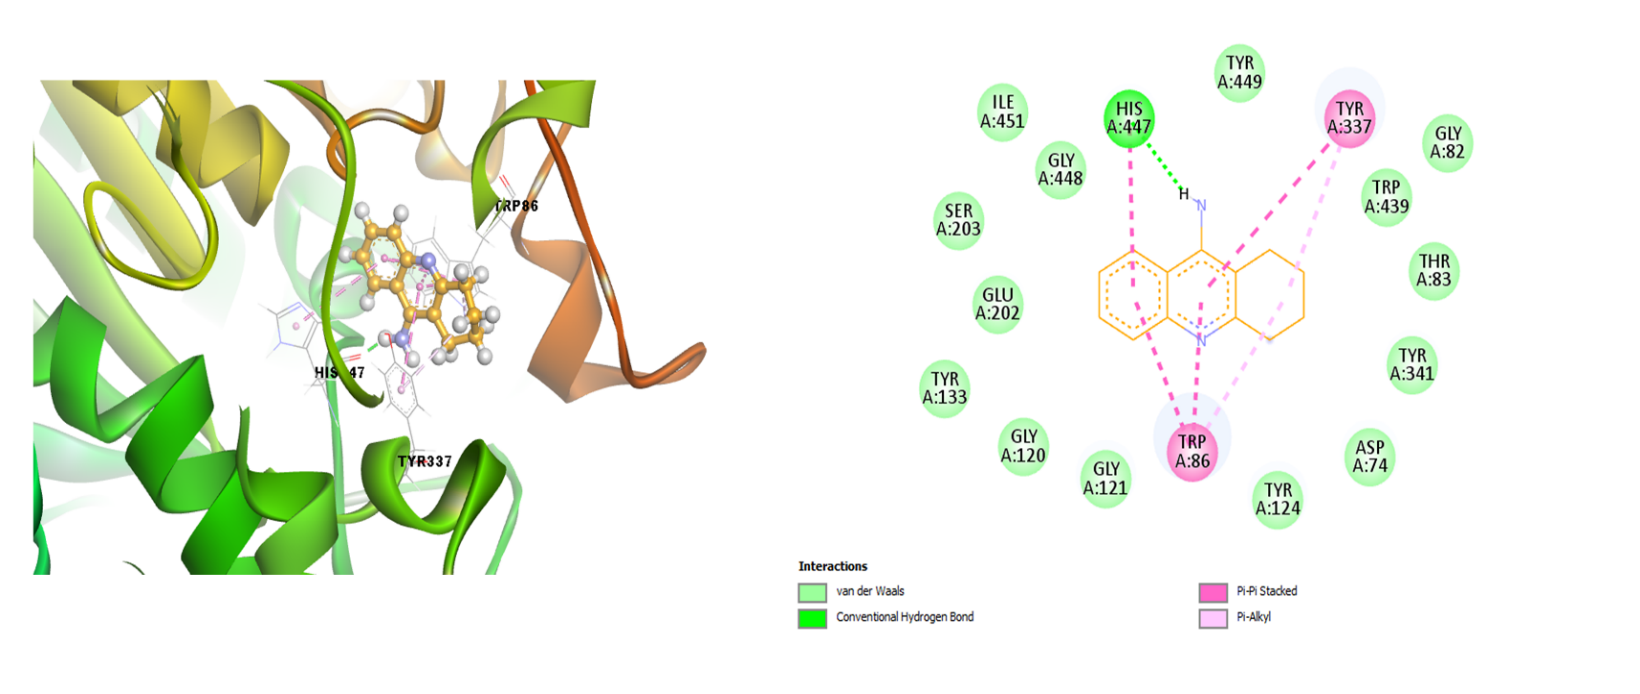


**Figure S7-A.** 3D and 2D docking pose and interactions of Tacrine (TAC) with AChE (PDB ID: 7XN1).


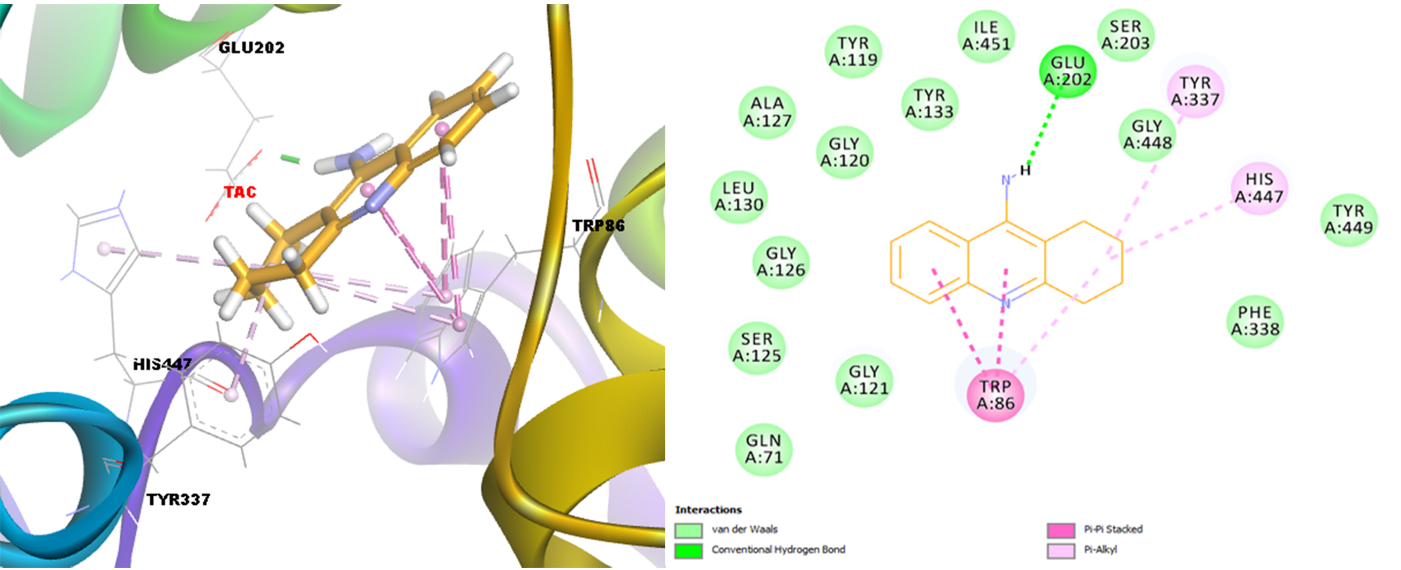


**Figure S7-B.** 3D and 2D docking pose and interactions of Tacrine (TAC) with AChE (PDB ID: 4EY6).


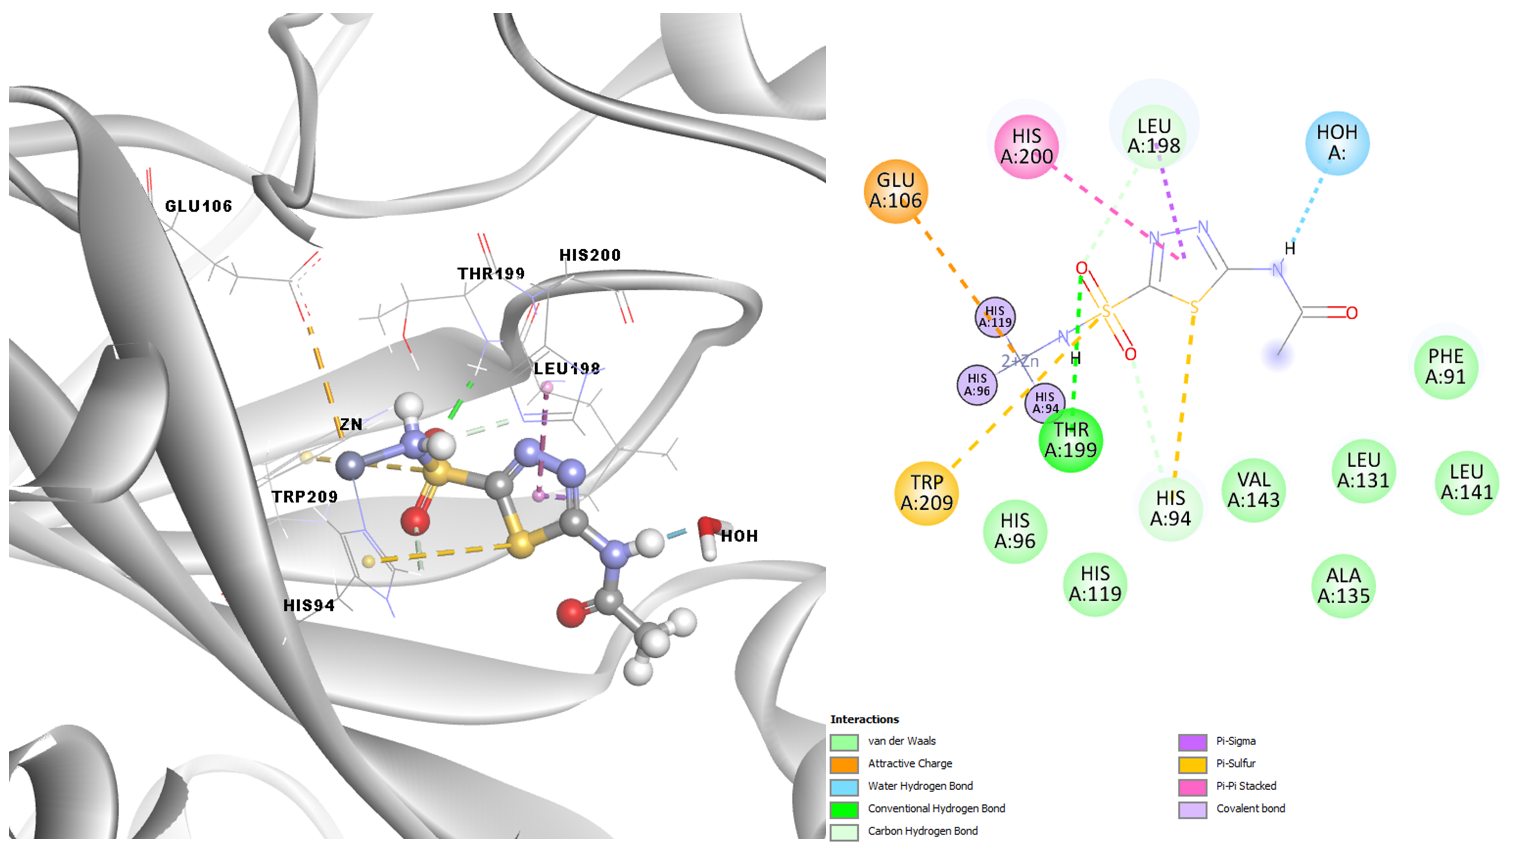


**Figure S8.** 3D and 2D docking pose and interactions of Acetazolamide (AZA) with hCA I (PDB ID: 1AZM).


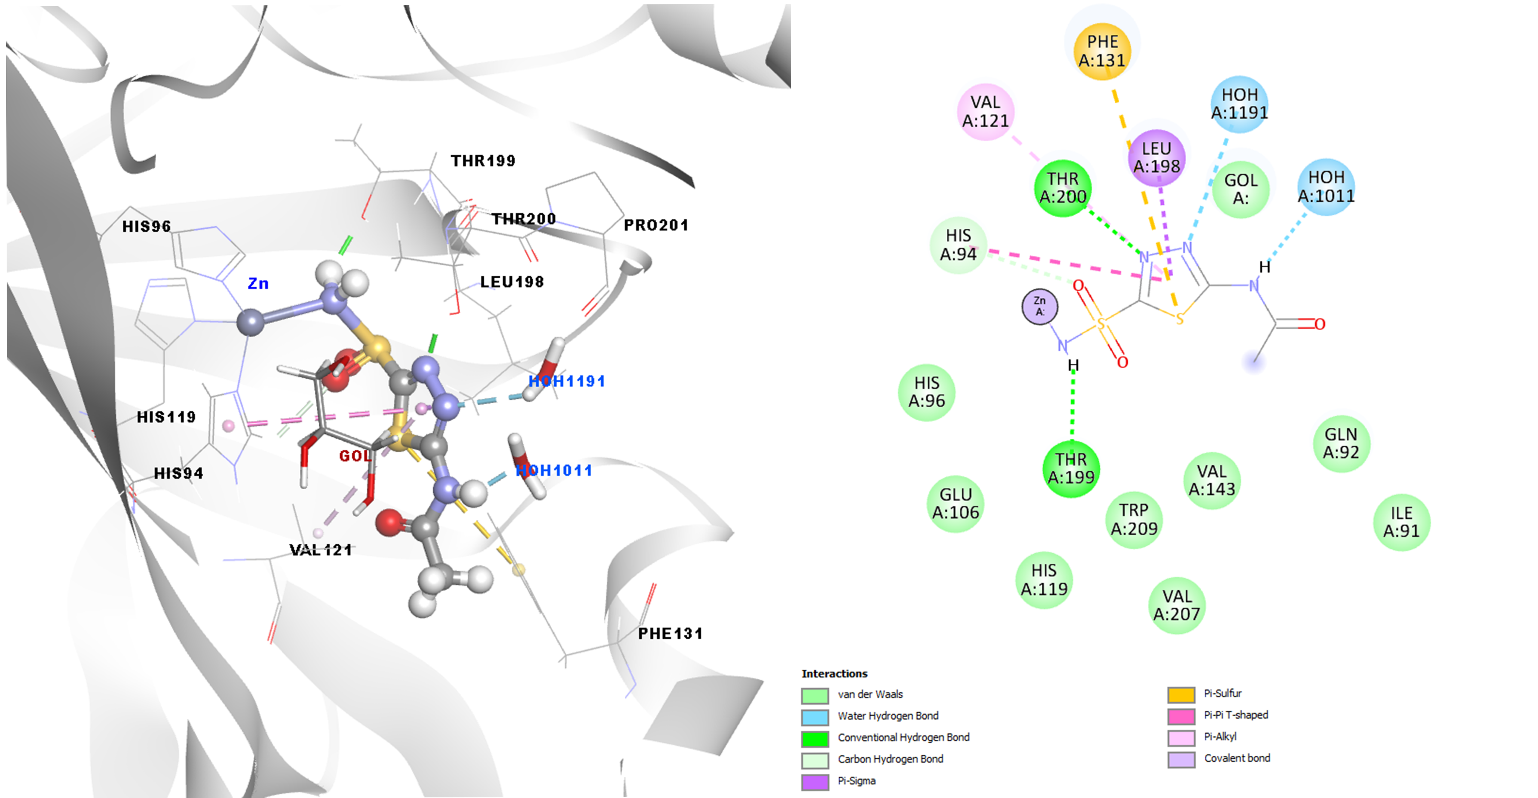


**Figure S9.** 3D and 2D docking pose and interactions of Acetazolamide (AZA) with hCA II (PDB ID: 3HS4).

**Table S7.** Interactions types and distances of the best pose of the compounds **6a, 6b,** **3a** and **3b** against AChE, hCA I and hCA II, and also Tacrine (TAC), Acetazolamide (AZA) as positive compounds of the targets, respectively.

| **Interactions (hAChE)** | **Distance Å** | **Bonding** | **Bonding Types** | **Binding site of target (hAChE )** | **Binding site of ligand (6a )** |
| --- | --- | --- | --- | --- | --- |
| A:ASP74:HN - :6a:O | 2.4784 | Hydrogen Bond | Conventional Hydrogen Bond | A:ASP74:HN | :6a:O |
| A:TYR124:HH - :6a:N | 2.3257 | Hydrogen Bond | Conventional Hydrogen Bond | A:TYR124:HH | :6a:N |
| A:VAL73:HA - :6a:O | 2.1376 | Hydrogen Bond | Carbon Hydrogen Bond | A:VAL73:HA | :6a:O |
| :6a:H19 - A:GLN71:OE1 | 2.0176 | Hydrogen Bond | Carbon Hydrogen Bond | A:GLN71:OE1 | :6a:H19 |
| :6a:H20 - A:ASN87:OD1 | 2.8179 | Hydrogen Bond | Carbon Hydrogen Bond | A:ASN87:OD1 | :6a:H20 |
| :6a:H21 - A:THR83:O | 2.6345 | Hydrogen Bond | Carbon Hydrogen Bond | A:THR83:O | :6a:H21 |
| :6a:H22 - A:ASP74:OD2 | 2.8723 | Hydrogen Bond | Carbon Hydrogen Bond | A:ASP74:OD2 | :6a:H22 |
| :6a:H23 - A:ASP74:OD2 | 2.4258 | Hydrogen Bond | Carbon Hydrogen Bond | A:ASP74:OD2 | :6a:H23 |
| :6a:H34 - A:TYR133:OH | 2.4897 | Hydrogen Bond | Carbon Hydrogen Bond | A:TYR133:OH | :6a:H34 |
| :6a:H36 - A:GLY120:O | 2.5593 | Hydrogen Bond | Carbon Hydrogen Bond | A:GLY120:O | :6a:H36 |
| A:HIS447:NE2 - :6a | 4.3156 | Electrostatic | Pi-Cation | A:HIS447:NE2 | :6a |
| :6a:S - A:TRP286 | 4.1820 | Other | Pi-Sulfur | A:TRP286 | :6a:S |
| :6a:S - A:PHE297 | 4.8897 | Other | Pi-Sulfur | A:PHE297 | :6a:S |
| A:TRP286 - :6a | 4.4525 | Hydrophobic | Pi-Pi Stacked | A:TRP286 | :6a |
| A:TRP286 - :6a | 3.9528 | Hydrophobic | Pi-Pi Stacked | A:TRP286 | :6a |
| :6a - A:TYR341 | 3.9724 | Hydrophobic | Pi-Pi Stacked | A:TYR341 | :6a |
| A:TRP86 - :6a | 5.0686 | Hydrophobic | Pi-Pi T-shaped | A:TRP86 | :6a |
| A:TRP86 - :6a | 4.7103 | Hydrophobic | Pi-Pi T-shaped | A:TRP86 | :6a |
| A:TYR337 - :6a | 5.3578 | Hydrophobic | Pi-Pi T-shaped | A:TYR337 | :6a |
| A:HIS447 - :6a | 4.6649 | Hydrophobic | Pi-Pi T-shaped | A:HIS447 | :6a |
| :6a - A:TYR124 | 5.7082 | Hydrophobic | Pi-Pi T-shaped | A:TYR124 | :6a |
| :6a:C - A:VAL73 | 4.2061 | Hydrophobic | Alkyl | A:VAL73 | :6a:C |
| :6a:C - A:PRO88 | 3.7292 | Hydrophobic | Alkyl | A:PRO88 | :6a:C |
| :6a:C - A:LEU130 | 5.3485 | Hydrophobic | Alkyl | A:LEU130 | :6a:C |
| A:TRP86 - :6a:C | 4.4455 | Hydrophobic | Pi-Alkyl | A:TRP86 | :6a:C |
| A:TRP86 - :6a:C | 5.1465 | Hydrophobic | Pi-Alkyl | A:TRP86 | :6a:C |
| A:TRP86 - :6a:C | 4.6705 | Hydrophobic | Pi-Alkyl | A:TRP86 | :6a:C |
| A:PHE297 - :6a:C | 4.2476 | Hydrophobic | Pi-Alkyl | A:PHE297 | :6a:C |
| A:PHE338 - :6a:C | 4.8518 | Hydrophobic | Pi-Alkyl | A:PHE338 | :6a:C |
| :6a - A:VAL294 | 4.8698 | Hydrophobic | Pi-Alkyl | A:VAL294 | :6a |
| **Interactions (hAChE)** | **Distance Å** | **Bonding** | **Bonding Types** | **Binding site of target (hAChE )** | **Binding site of ligand (6b )** |
| :6b:H - A:TYR124:OH | 2.4874 | Hydrogen Bond | Conventional Hydrogen Bond | A:TYR124:OH | :6b:H |
| A:HIS287:HA - :6b:O | 2.3727 | Hydrogen Bond | Carbon Hydrogen Bond | A:HIS287:HA | :6b:O |
| :6b:H19 - A:HIS287:O | 2.8934 | Hydrogen Bond | Carbon Hydrogen Bond | A:HIS287:O | :6b:H19 |
| :6b:S - A:TYR124 | 5.7750 | Other | Pi-Sulfur | A:TYR124 | :6b:S |
| :6b:S - A:TYR337 | 5.0564 | Other | Pi-Sulfur | A:TYR337 | :6b:S |
| A:TRP286 - :6b | 4.7007 | Hydrophobic | Pi-Pi Stacked | A:TRP286 | :6b |
| A:TRP286 - :6b | 5.9217 | Hydrophobic | Pi-Pi T-shaped | A:TRP286 | :6b |
| :6b - A:LEU76 | 4.8467 | Hydrophobic | Pi-Alkyl | A:LEU76 | :6b |
| **Interactions (hAChE)** | **Distance Å** | **Bonding** | **Bonding Types** | **Binding site of target (hAChE )** | **Binding site of ligand**  **(TAC-4EY6 )** |
| :TAC:H27 - A:GLU202:OE1 | 1.9707 | Hydrogen Bond | Conventional Hydrogen Bond | A:GLU202:OE1 | :TAC:H27 |
| A:TRP86 - :TAC | 4.0979 | Hydrophobic | Pi-Pi Stacked | A:TRP86 | :TAC |
| A:TRP86 - :TAC | 4.9290 | Hydrophobic | Pi-Pi Stacked | A:TRP86 | :TAC |
| A:TRP86 - :TAC | 3.7454 | Hydrophobic | Pi-Pi Stacked | A:TRP86 | :TAC |
| A:TRP86 - :TAC | 4.6814 | Hydrophobic | Pi-Pi Stacked | A:TRP86 | :TAC |
| A:TRP86 - :TAC | 4.9323 | Hydrophobic | Pi-Alkyl | A:TRP86 | :TAC |
| A:TRP86 - :TAC | 4.6616 | Hydrophobic | Pi-Alkyl | A:TRP86 | :TAC |
| A:TYR337 - :TAC | 4.8422 | Hydrophobic | Pi-Alkyl | A:TYR337 | :TAC |
| A:HIS447 - :TAC | 4.5681 | Hydrophobic | Pi-Alkyl | A:HIS447 | :TAC |
| **Interactions (hAChE)** | **Distance Å** | **Bonding** | **Bonding Types** | **Binding site of target (hAChE )** | **Binding site of ligand**  **(TAC-7XN1 )** |
| A:TAC:H13 - A:HIS447:O | 1.5559 | Hydrogen Bond | Conventional Hydrogen Bond | A:HIS447:O | A:TAC:H13 |
| A:TRP86 - A:TAC | 4.5768 | Hydrophobic | Pi-Pi Stacked | A:TRP86 | A:TAC |
| A:TRP86 - A:TAC | 3.5752 | Hydrophobic | Pi-Pi Stacked | A:TRP86 | A:TAC |
| A:TRP86 - A:TAC | 3.8031 | Hydrophobic | Pi-Pi Stacked | A:TRP86 | A:TAC |
| A:TRP86 - A:TAC | 4.0545 | Hydrophobic | Pi-Pi Stacked | A:TRP86 | A:TAC |
| A:TYR337 - A:TAC | 5.1147 | Hydrophobic | Pi-Pi Stacked | A:TYR337 | A:TAC |
| A:HIS447 - A:TAC | 5.5952 | Hydrophobic | Pi-Pi Stacked | A:HIS447 | A:TAC |
| A:TRP86 - A:TAC | 4.4411 | Hydrophobic | Pi-Alkyl | A:TRP86 | A:TAC |
| A:TYR337 - A:TAC | 4.6671 | Hydrophobic | Pi-Alkyl | A:TYR337 | A:TAC |

| **Interactions (hCA-I )** | **Distance Å** | **Bonding** | **Bonding Types** | **Binding site of target (hCA-I )** | **Binding site of ligand (3b )** |
| --- | --- | --- | --- | --- | --- |
| A:HIS67:HE1 - :3b:O | 2.5816 | Hydrogen Bond | Carbon Hydrogen Bond | A:HIS67:HE1 | :3b:O |
| A:HIS200:HE1 - :3b:O | 2.2808 | Hydrogen Bond | Carbon Hydrogen Bond | A:HIS200:HE1 | :3b:O |
| A:ZN:ZN - :3b | 4.8082 | Electrostatic | Pi-Cation | A:ZN:ZN | :3b |
| A:HIS94 - :3b | 4.9399 | Hydrophobic | Pi-Pi T-shaped | A:HIS94 | :3b |
| :3b:C - A:PRO202 | 4.5329 | Hydrophobic | Alkyl | A:PRO202 | :3b:C |
| A:HIS67 - :3b:C | 4.7697 | Hydrophobic | Pi-Alkyl | A:HIS67 | :3b:C |
| A:TYR204 - :3b:C | 5.0250 | Hydrophobic | Pi-Alkyl | A:TYR204 | :3b:C |
| :3b - A:ALA121 | 4.9534 | Hydrophobic | Pi-Alkyl | A:ALA121 | :3b |
| :3b - A:LEU198 | 4.8229 | Hydrophobic | Pi-Alkyl | A:LEU198 | :3b |
| :3b - A:ALA135 | 5.3352 | Hydrophobic | Pi-Alkyl | A:ALA135 | :3b |
| :3b - A:PRO202 | 4.3491 | Hydrophobic | Pi-Alkyl | A:PRO202 | :3b |
| **Interactions (hCA-I )** | **Distance Å** | **Bonding** | **Bonding Types** | **Binding site of target (hCA-I )** | **Binding site of ligand (3a )** |
| A:HIS67:HD1 - :3a:O | 2.3829 | Hydrogen Bond | Conventional Hydrogen Bond | A:HIS67:HD1 | :3a:O |
| A:ASN69:HD21 - :3a:O | 2.4750 | Hydrogen Bond | Conventional Hydrogen Bond | A:ASN69:HD21 | :3a:O |
| A:GLN92:HE22 - :3a:O | 2.6845 | Hydrogen Bond | Conventional Hydrogen Bond | A:GLN92:HE22 | :3a:O |
| A:PHE91 - :3a | 5.3733 | Hydrophobic | Pi-Pi T-shaped | A:PHE91 | :3a |
| A:ALA135 - :3a:C | 3.7918 | Hydrophobic | Alkyl | A:ALA135 | :3a:C |
| :3a:C - A:VAL62 | 4.2686 | Hydrophobic | Alkyl | A:VAL62 | :3a:C |
| :3a:C - A:PRO202 | 5.3941 | Hydrophobic | Alkyl | A:PRO202 | :3a:C |
| :3a:C - A:LEU131 | 4.5014 | Hydrophobic | Alkyl | A:LEU131 | :3a:C |
| :3a:C - A:LEU141 | 4.5841 | Hydrophobic | Alkyl | A:LEU141 | :3a:C |
| :3a:C - A:LEU198 | 5.1778 | Hydrophobic | Alkyl | A:LEU198 | :3a:C |
| :3a:C - A:LEU198 | 4.7717 | Hydrophobic | Alkyl | A:LEU198 | :3a:C |
| A:HIS67 - :3a:C | 4.6301 | Hydrophobic | Pi-Alkyl | A:HIS67 | :3a:C |
| A:PHE91 - :3a:C | 5.4176 | Hydrophobic | Pi-Alkyl | A:PHE91 | :3a:C |
| A:HIS94 - :3a:C | 4.9099 | Hydrophobic | Pi-Alkyl | A:HIS94 | :3a:C |
| :3a - A:LEU131 | 5.1402 | Hydrophobic | Pi-Alkyl | A:LEU131 | :3a |
| **Interactions (hCA-I )** | **Distance Å** | **Bonding** | **Bonding Types** | **Binding site of target (hCA-I )** | **Binding site of ligand**  **(AZA-1AZM )** |
| A:Zn:Zn - A:GLU106:OE1 | 4.2229 | Electrostatic | Attractive Charge | A:GLU106:OE1 | A:Zn:Zn |
| A:AZA:H6 - A:HOH:O | 1.7557 | Hydrogen Bond | Water Hydrogen Bond;Conventional Hydrogen Bond | A:HOH:O | A:AZA:H6 |
| A:THR199:HN - A:AZA:O2 | 2.1353 | Hydrogen Bond | Conventional Hydrogen Bond | A:THR199:HN | A:AZA:O2 |
| A:HIS94:HE1 - A:AZA:O1 | 2.6980 | Hydrogen Bond | Carbon Hydrogen Bond | A:HIS94:HE1 | A:AZA:O1 |
| A:LEU198:HA - A:AZA:O2 | 2.5896 | Hydrogen Bond | Carbon Hydrogen Bond | A:LEU198:HA | A:AZA:O2 |
| A:LEU198:HD23 - A:AZA | 2.3892 | Hydrophobic | Pi-Sigma | A:LEU198:HD23 | A:AZA |
| A:AZA:S1 - A:TRP209 | 5.5605 | Other | Pi-Sulfur | A:TRP209 | A:AZA:S1 |
| A:AZA:S2 - A:HIS94 | 5.3908 | Other | Pi-Sulfur | A:HIS94 | A:AZA:S2 |
| A:HIS200 - A:AZA | 4.2442 | Hydrophobic | Pi-Pi Stacked | A:HIS200 | A:AZA |
| A:ZN:ZN - A:GLU106:OE1 | 4.2229 | Electrostatic | Attractive Charge | A:GLU106:OE1 | A:ZN:ZN |
| A:THR199:HN - A:AZA:O2 | 2.1353 | Hydrogen Bond | Conventional Hydrogen Bond | A:THR199:HN | A:AZA:O2 |
| A:HIS94:HE1 - A:AZA:O1 | 2.6980 | Hydrogen Bond | Carbon Hydrogen Bond | A:HIS94:HE1 | A:AZA:O1 |
| A:LEU198:HA - A:AZA:O2 | 2.5896 | Hydrogen Bond | Carbon Hydrogen Bond | A:LEU198:HA | A:AZA:O2 |
| A:LEU198:HD23 - A:AZA | 2.3892 | Hydrophobic | Pi-Sigma | A:LEU198:HD23 | A:AZA |
| A:AZA:S1 - A:TRP209 | 5.5605 | Other | Pi-Sulfur | A:TRP209 | A:AZA:S1 |
| A:AZA:S2 - A:HIS94 | 5.3908 | Other | Pi-Sulfur | A:HIS94 | A:AZA:S2 |
| A:HIS200 - A:AZA | 4.2442 | Hydrophobic | Pi-Pi Stacked | A:HIS200 | A:AZA |

| **Interactions (hCA-II )** | **Distance Å** | **Bonding** | **Bonding Types** | **Binding site of target (hCA-II )** | **Binding site of ligand (3b )** |
| --- | --- | --- | --- | --- | --- |
| A:HIS94 - :3b | 4.7705 | Hydrophobic | Pi-Pi T-shaped | A:HIS94 | :3b |
| A:ALA65 - :3b:C | 3.6402 | Hydrophobic | Alkyl | A:ALA65 | :3b:C |
| :3b:C - A:VAL121 | 4.1758 | Hydrophobic | Alkyl | A:VAL121 | :3b:C |
| :3b:C - A:LEU198 | 4.7309 | Hydrophobic | Alkyl | A:LEU198 | :3b:C |
| A:HIS94 - :3b:C | 4.8593 | Hydrophobic | Pi-Alkyl | A:HIS94 | :3b:C |
| A:HIS96 - :3b:C | 4.3884 | Hydrophobic | Pi-Alkyl | A:HIS96 | :3b:C |
| :3b - A:VAL135 | 4.6070 | Hydrophobic | Pi-Alkyl | A:VAL135 | :3b |
| :3b - A:PRO202 | 4.5941 | Hydrophobic | Pi-Alkyl | A:PRO202 | :3b |
| :3b - A:ALA65 | 5.3981 | Hydrophobic | Pi-Alkyl | A:ALA65 | :3b |
| **Interactions (hCA-II )** | **Distance Å** | **Bonding** | **Bonding Types** | **Binding site of target (hCA-II )** | **Binding site of ligand (6a )** |
| A:ARG58:HH12 - :6a:O | 2.6161 | Hydrogen Bond | Conventional Hydrogen Bond | A:ARG58:HH12 | :6a:O |
| A:ASN67:HD22 - :6a:O | 2.4762 | Hydrogen Bond | Conventional Hydrogen Bond | A:ASN67:HD22 | :6a:O |
| A:THR200:HB - :6a:O | 3.0925 | Hydrogen Bond | Carbon Hydrogen Bond | A:THR200:HB | :6a:O |
| :6a:H21 - A:PRO201:O | 2.6388 | Hydrogen Bond | Carbon Hydrogen Bond | A:PRO201:O | :6a:H21 |
| A:LEU198:HD22 - :6a | 2.4604 | Hydrophobic | Pi-Sigma | A:LEU198:HD22 | :6a |
| :6a:S - A:PHE131 | 5.3645 | Other | Pi-Sulfur | A:PHE131 | :6a:S |
| A:ALA65 - :6a:C | 4.2307 | Hydrophobic | Alkyl | A:ALA65 | :6a:C |
| A:TRP5 - :6a:C | 4.8161 | Hydrophobic | Pi-Alkyl | A:TRP5 | :6a:C |
| A:TRP5 - :6a:C | 5.4031 | Hydrophobic | Pi-Alkyl | A:TRP5 | :6a:C |
| :6a - A:VAL121 | 4.9434 | Hydrophobic | Pi-Alkyl | A:VAL121 | :6a |
| **Interactions (hCA-II )** | **Distance Å** | **Bonding** | **Bonding Types** | **Binding site of target (hCA-II )** | **Binding site of ligand**  **(AZA-3HS4 )** |
| A:AZA:H6 - A:HOH1011:O | 1.6796 | Hydrogen Bond | Water Hydrogen Bond;Conventional Hydrogen Bond | A:HOH1011:O | A:AZA:H6 |
| A:HOH1191:H2 - A:AZA:N2 | 2.6417 | Hydrogen Bond | Water Hydrogen Bond;Conventional Hydrogen Bond | A:HOH1191:H2 | A:AZA:N2 |
| A:THR200:HG1 - A:AZA:N3 | 1.7351 | Hydrogen Bond | Conventional Hydrogen Bond | A:THR200:HG1 | A:AZA:N3 |
| A:AZA:H4 - A:THR199:OG1 | 1.8746 | Hydrogen Bond | Conventional Hydrogen Bond | A:THR199:OG1 | A:AZA:H4 |
| A:HIS94:HE1 - A:AZA:O2 | 2.6295 | Hydrogen Bond | Carbon Hydrogen Bond | A:HIS94:HE1 | A:AZA:O2 |
| A:LEU198:HD23 - A:AZA | 2.6949 | Hydrophobic | Pi-Sigma | A:LEU198:HD23 | A:AZA |
| A:AZA:S2 - A:PHE131 | 5.1892 | Hydrophobic | Pi-Sulfur | A:PHE131 | A:AZA:S2 |
| A:HIS94 - A:AZA | 5.6801 | Hydrophobic | Pi-Pi T-shaped | A:HIS94 | A:AZA |
| A:AZA - A:VAL121 | 5.4197 | Hydrophobic | Pi-Alkyl | A:VAL121 | A:AZA |

**COMPOUND CODES ON GRAPHS:**

**SP8: 3a**

**ADP5: 3b**

**PX1:6a**

**PX2:6b**

**PX3:6c**

**STP3: 10c**

**IC50 GRAPHS**


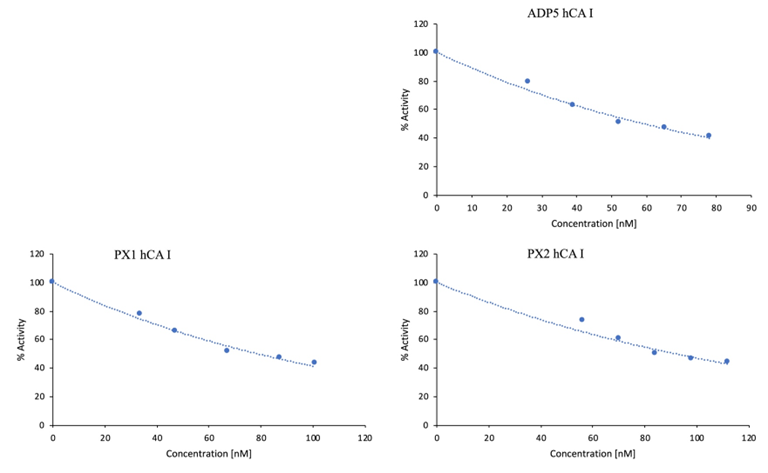


**
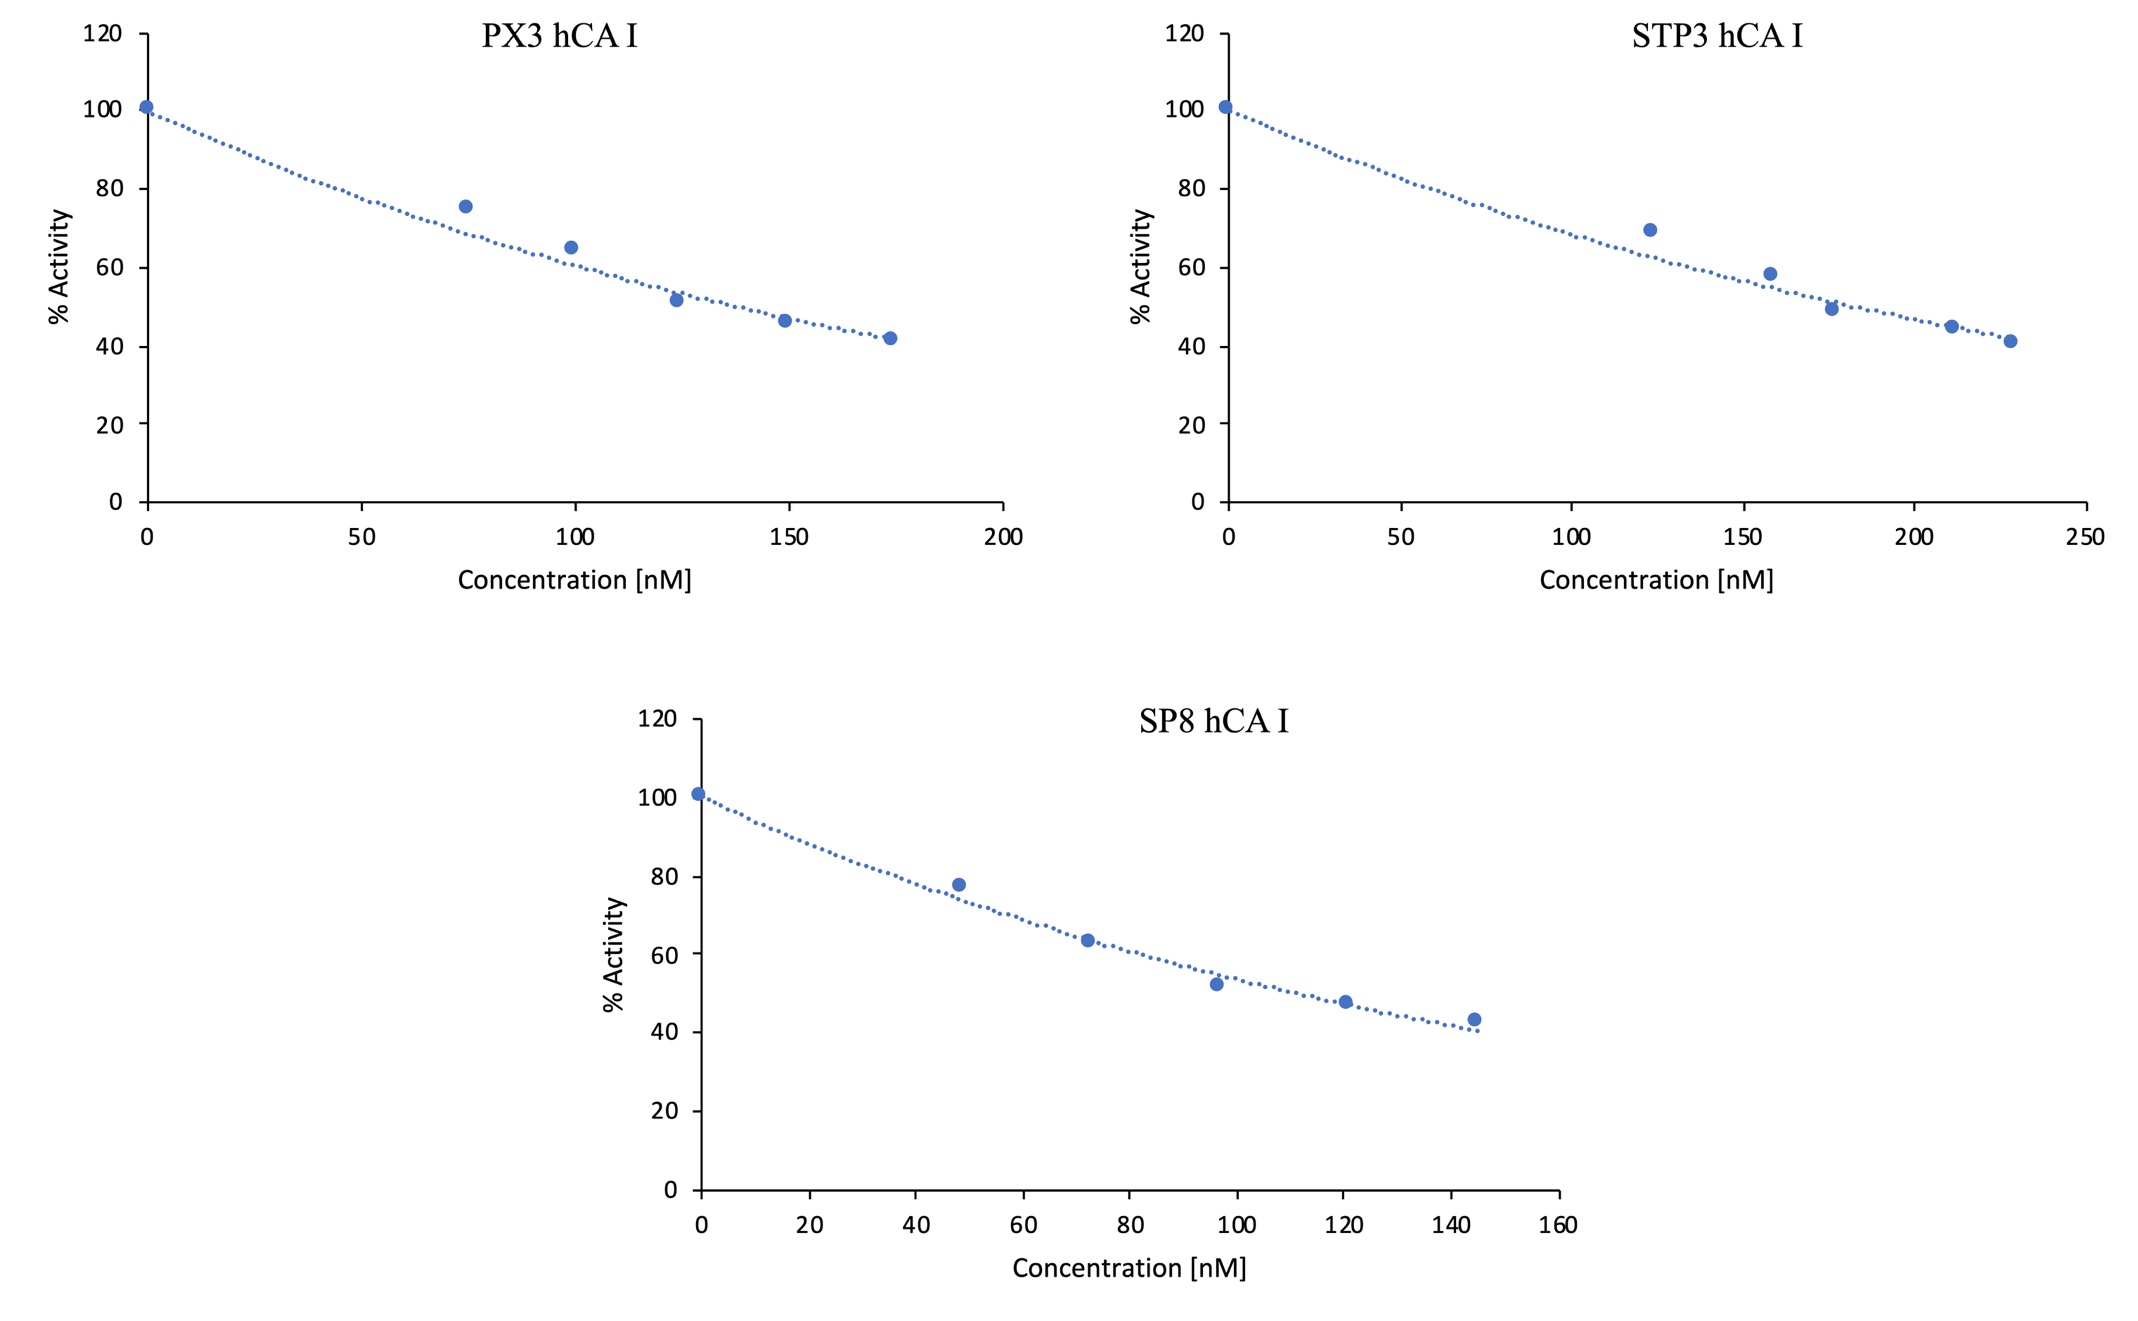
**


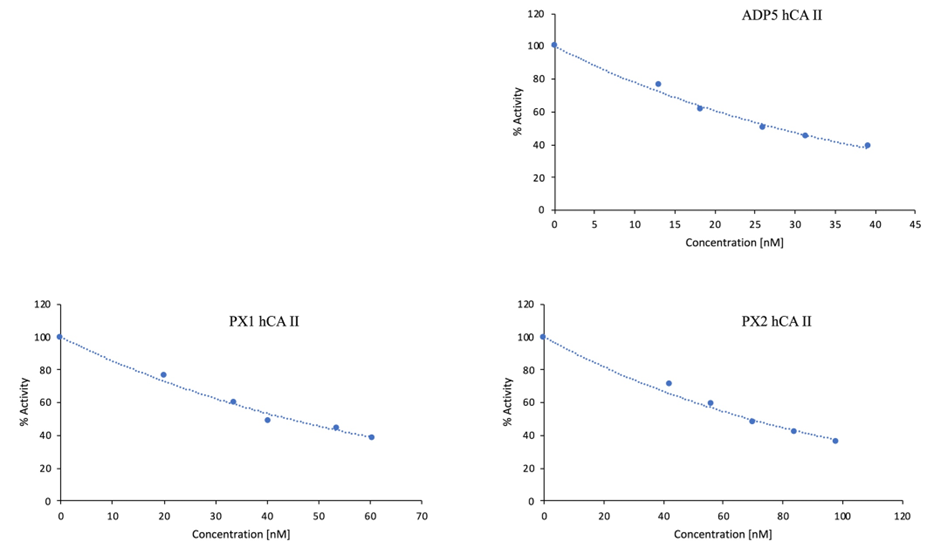


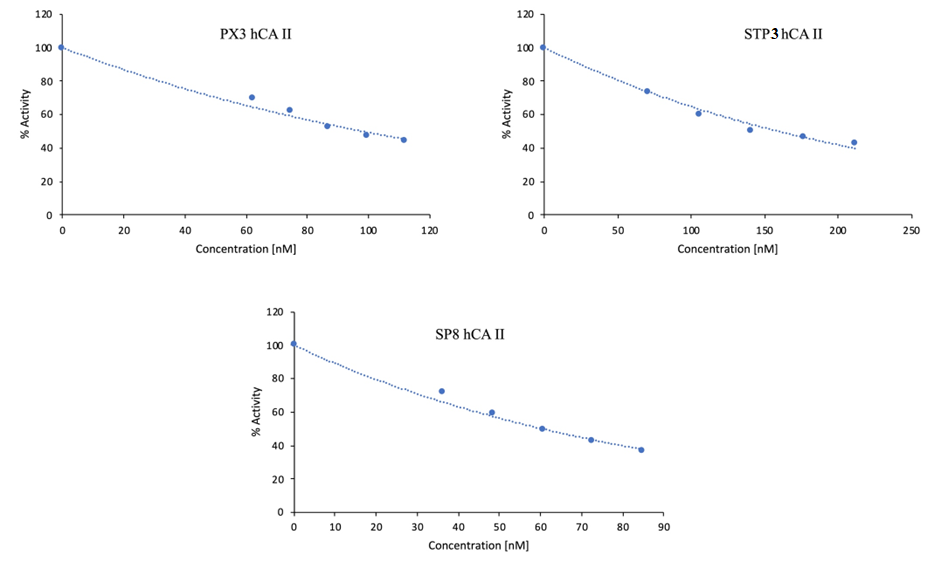


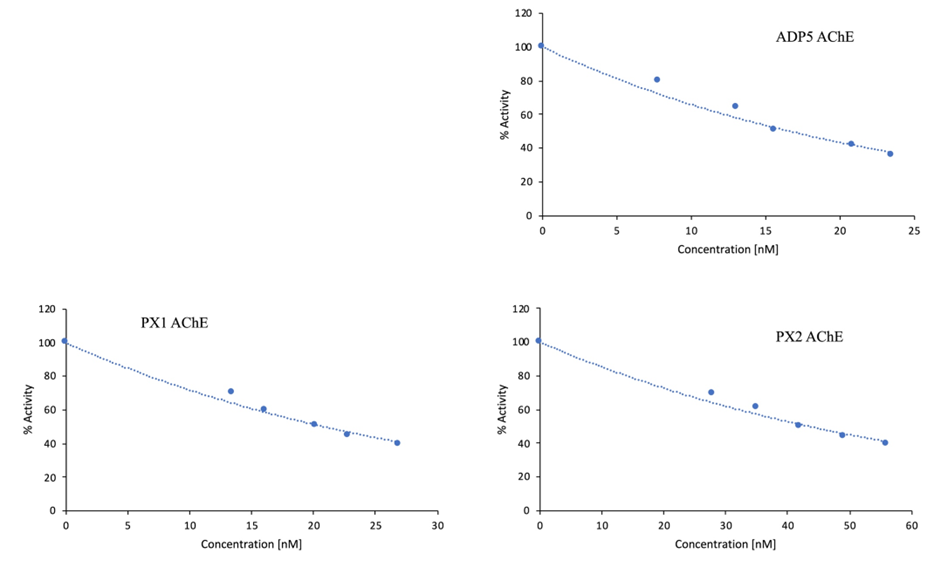


**
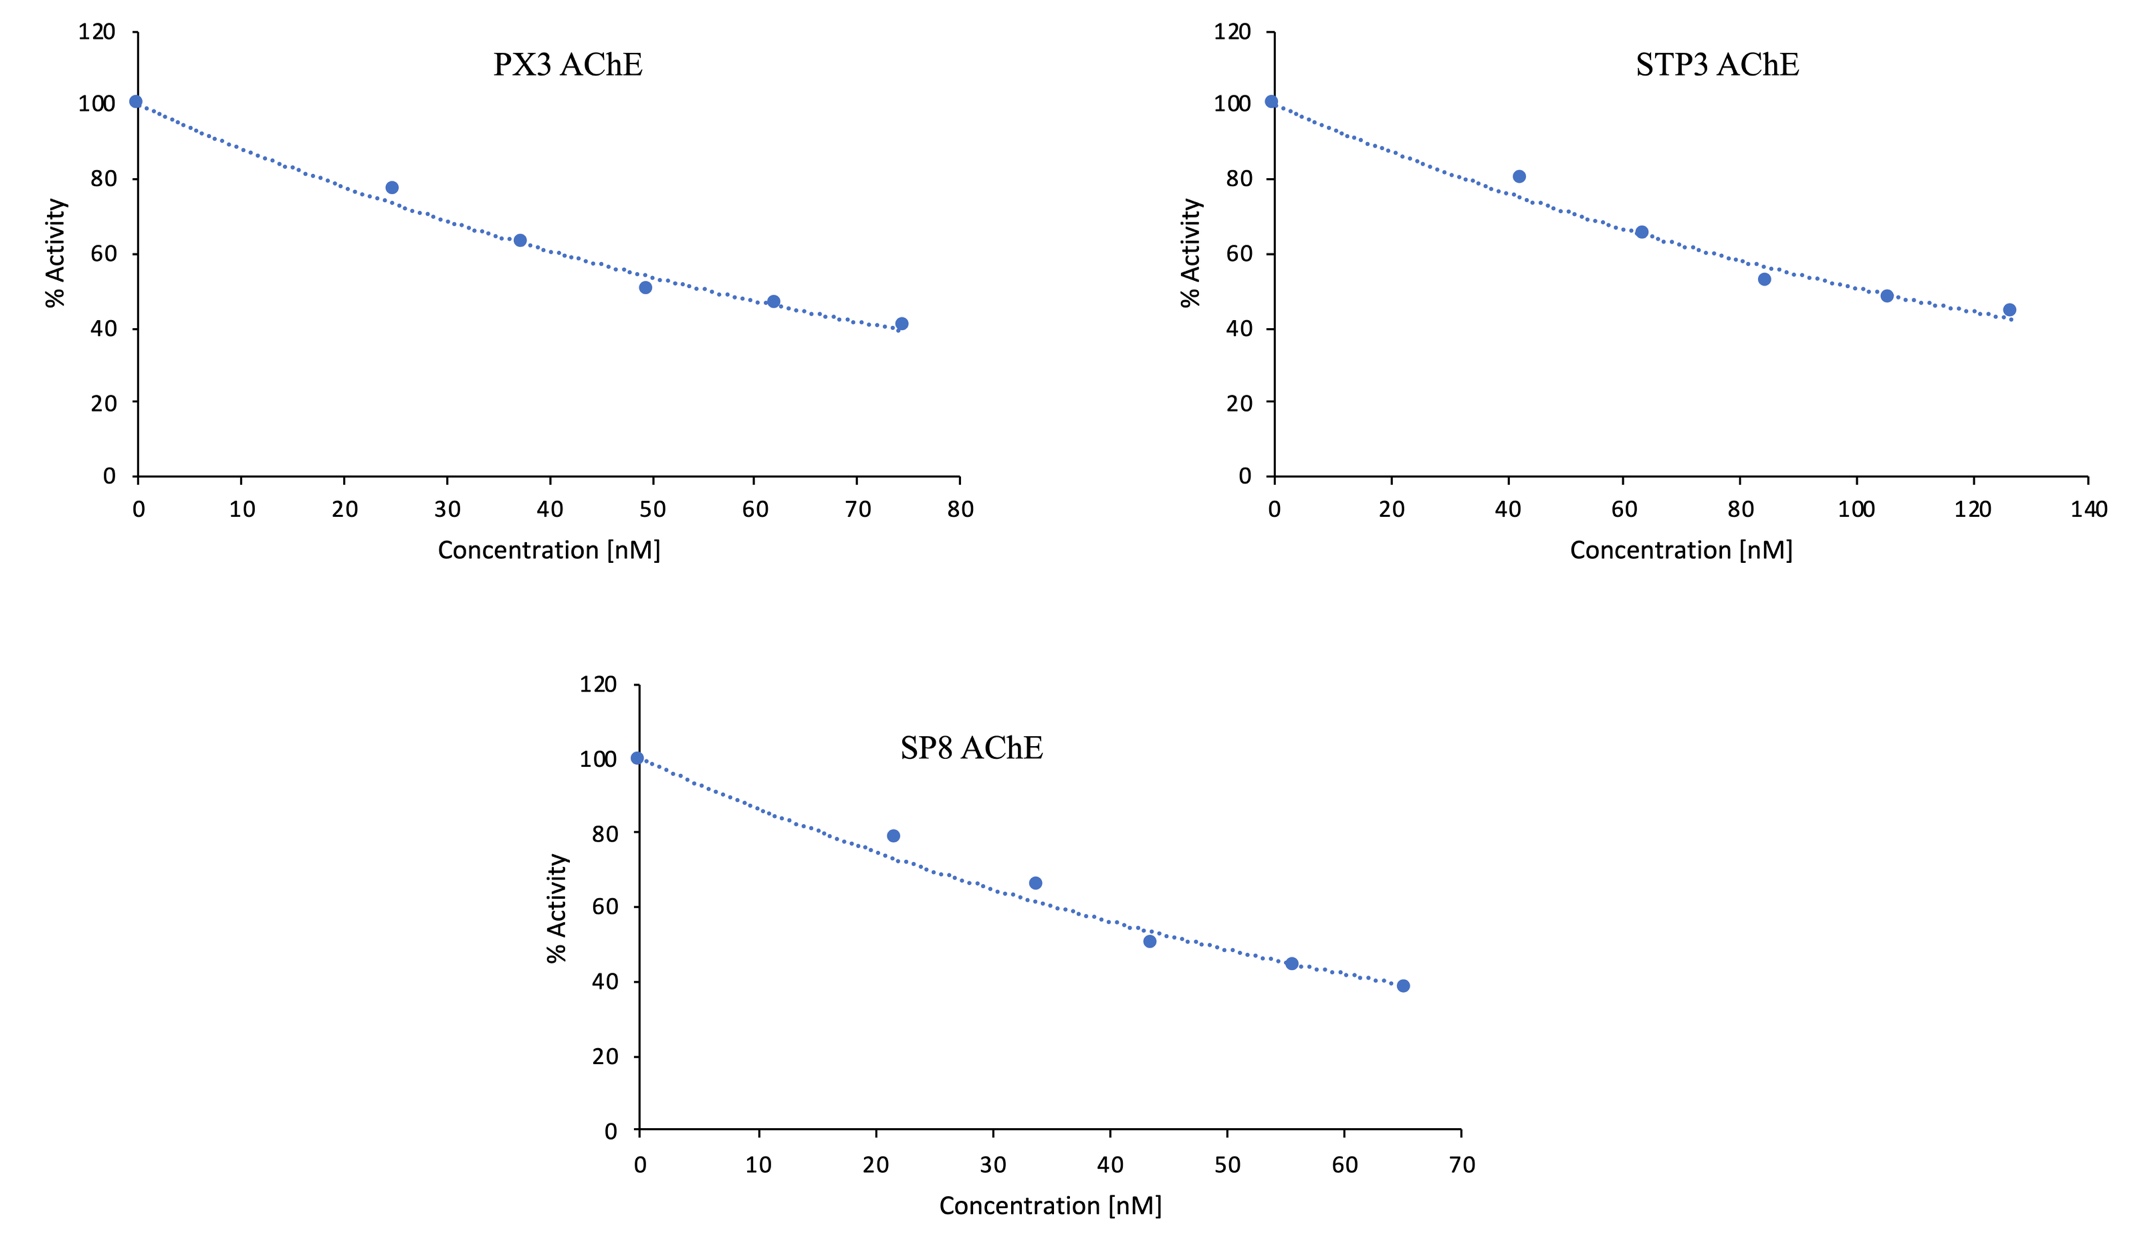
**

**Kİ GRAPHS**


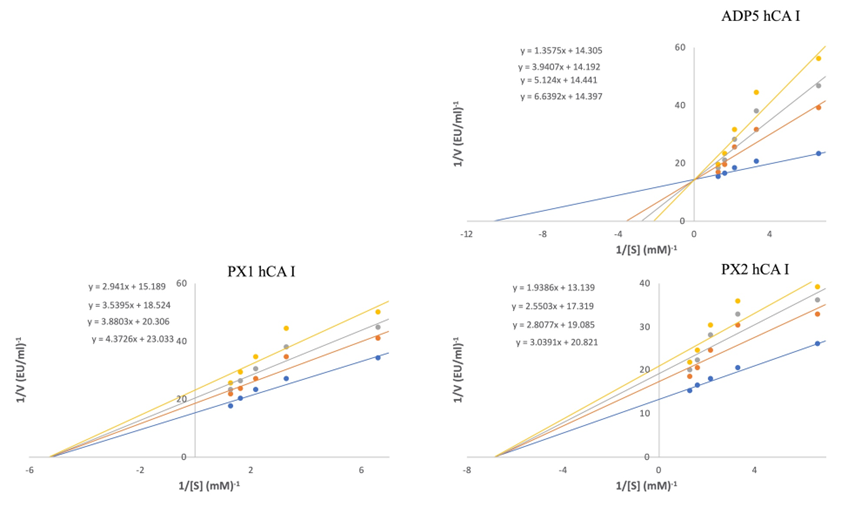


**
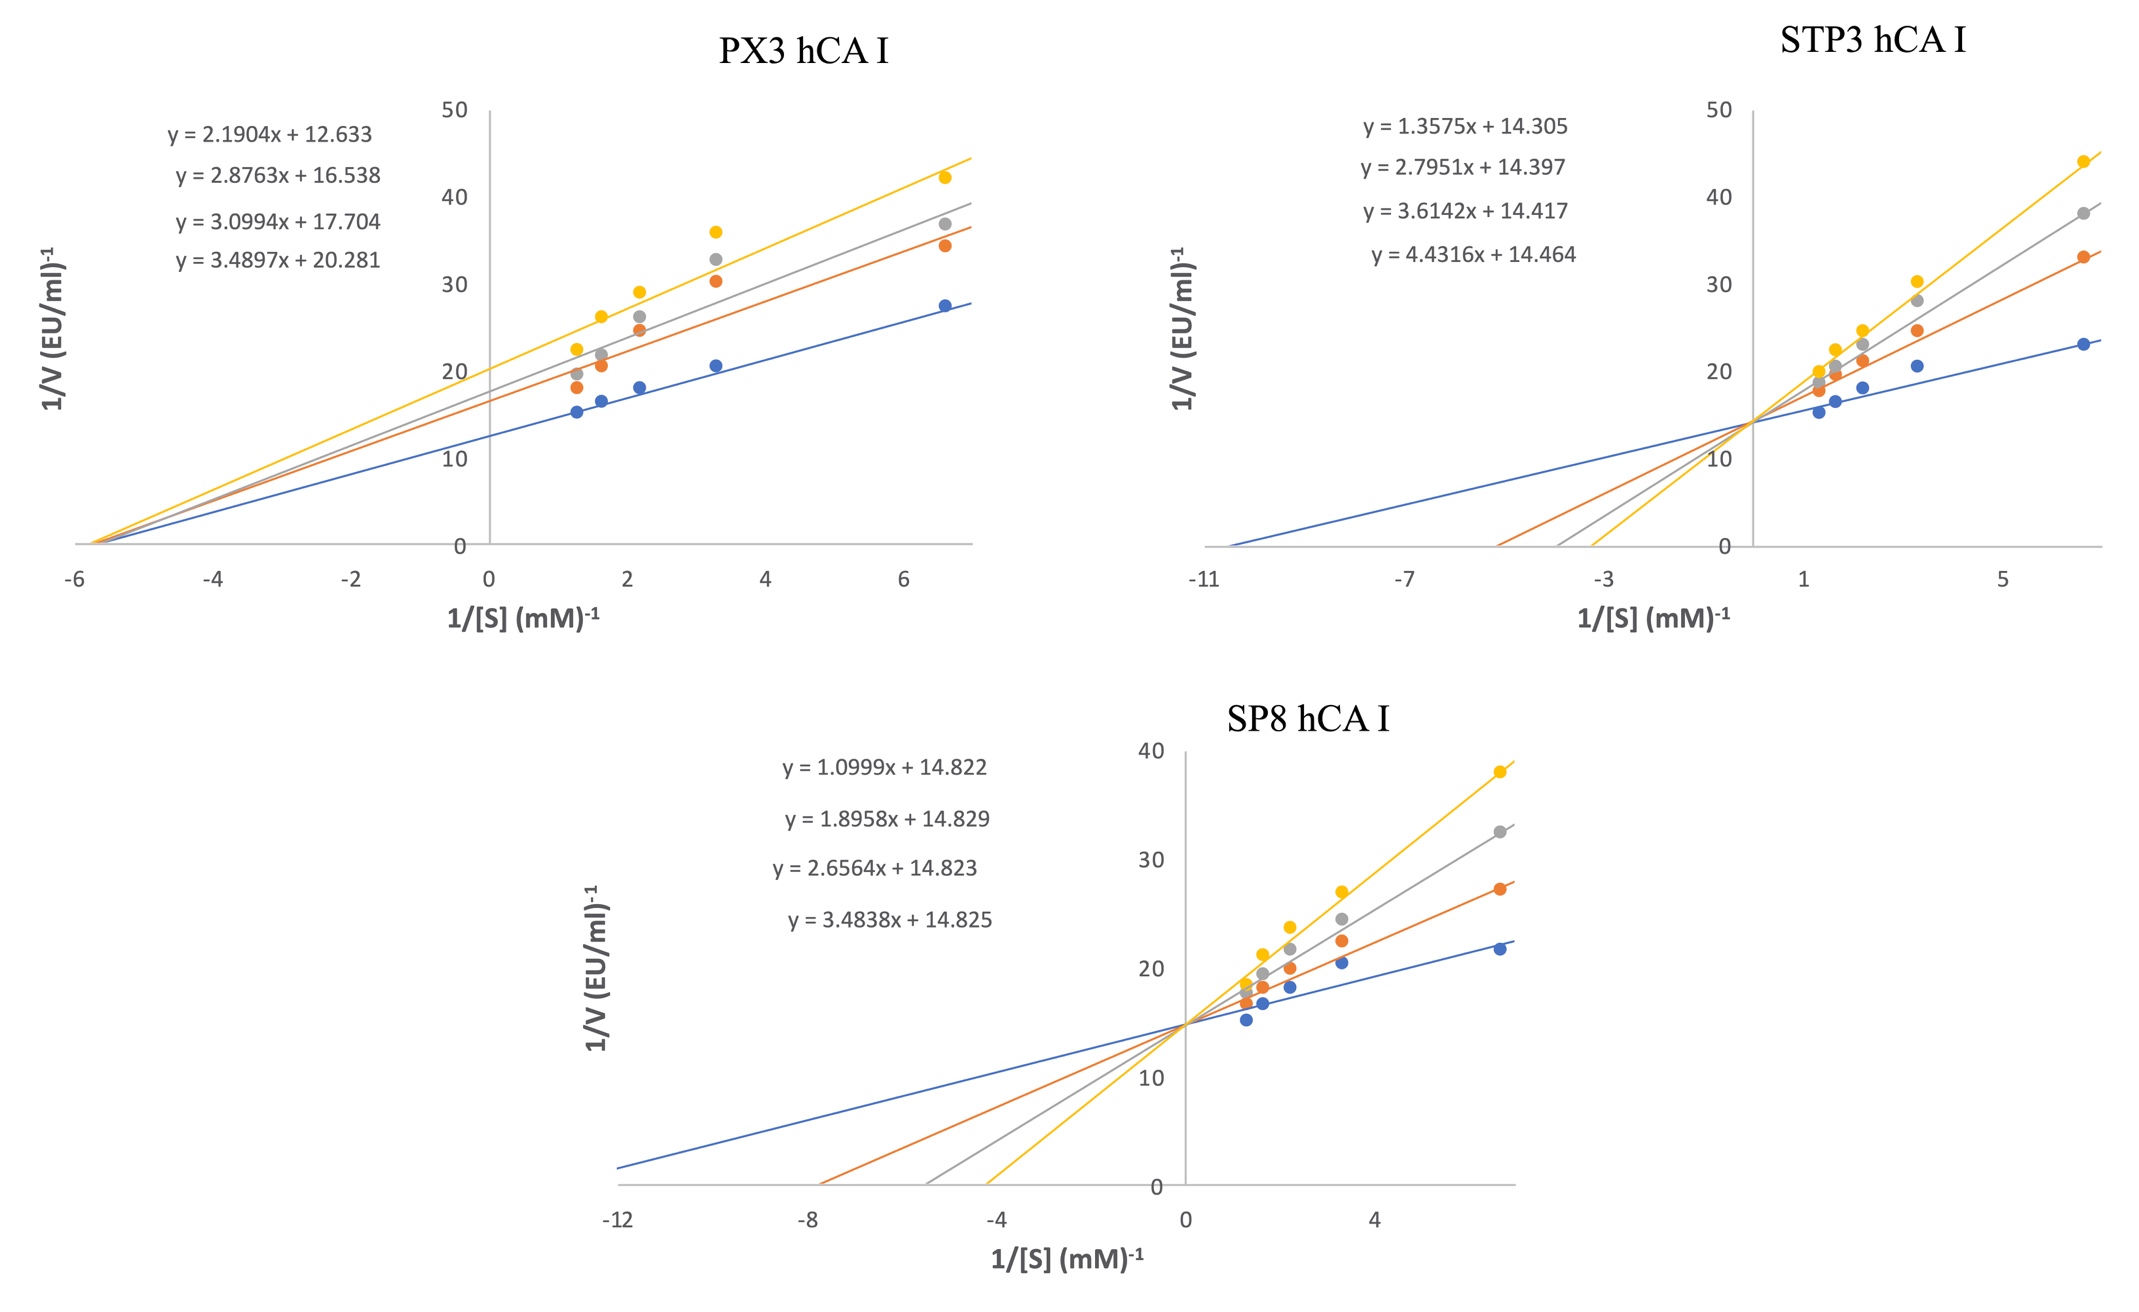
**


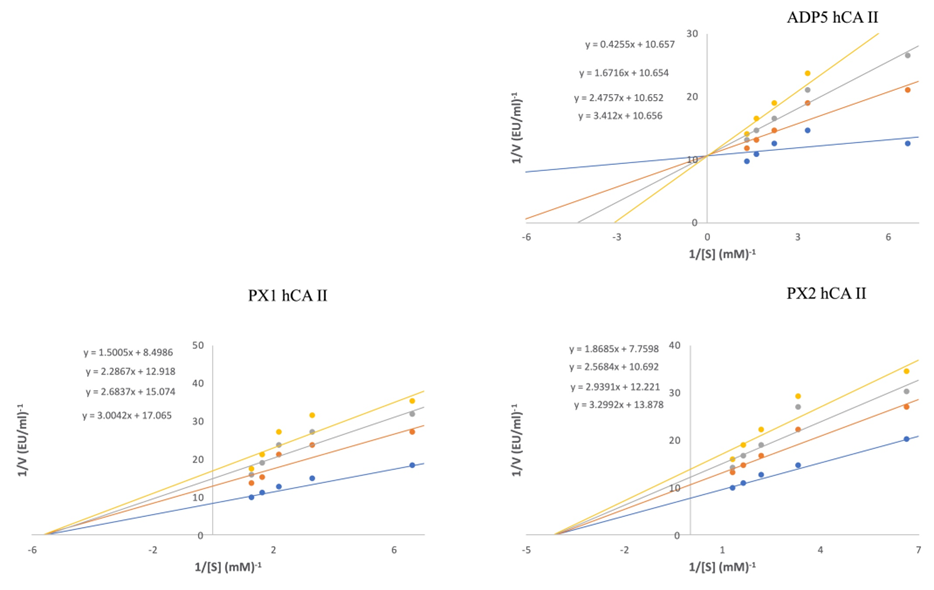


**
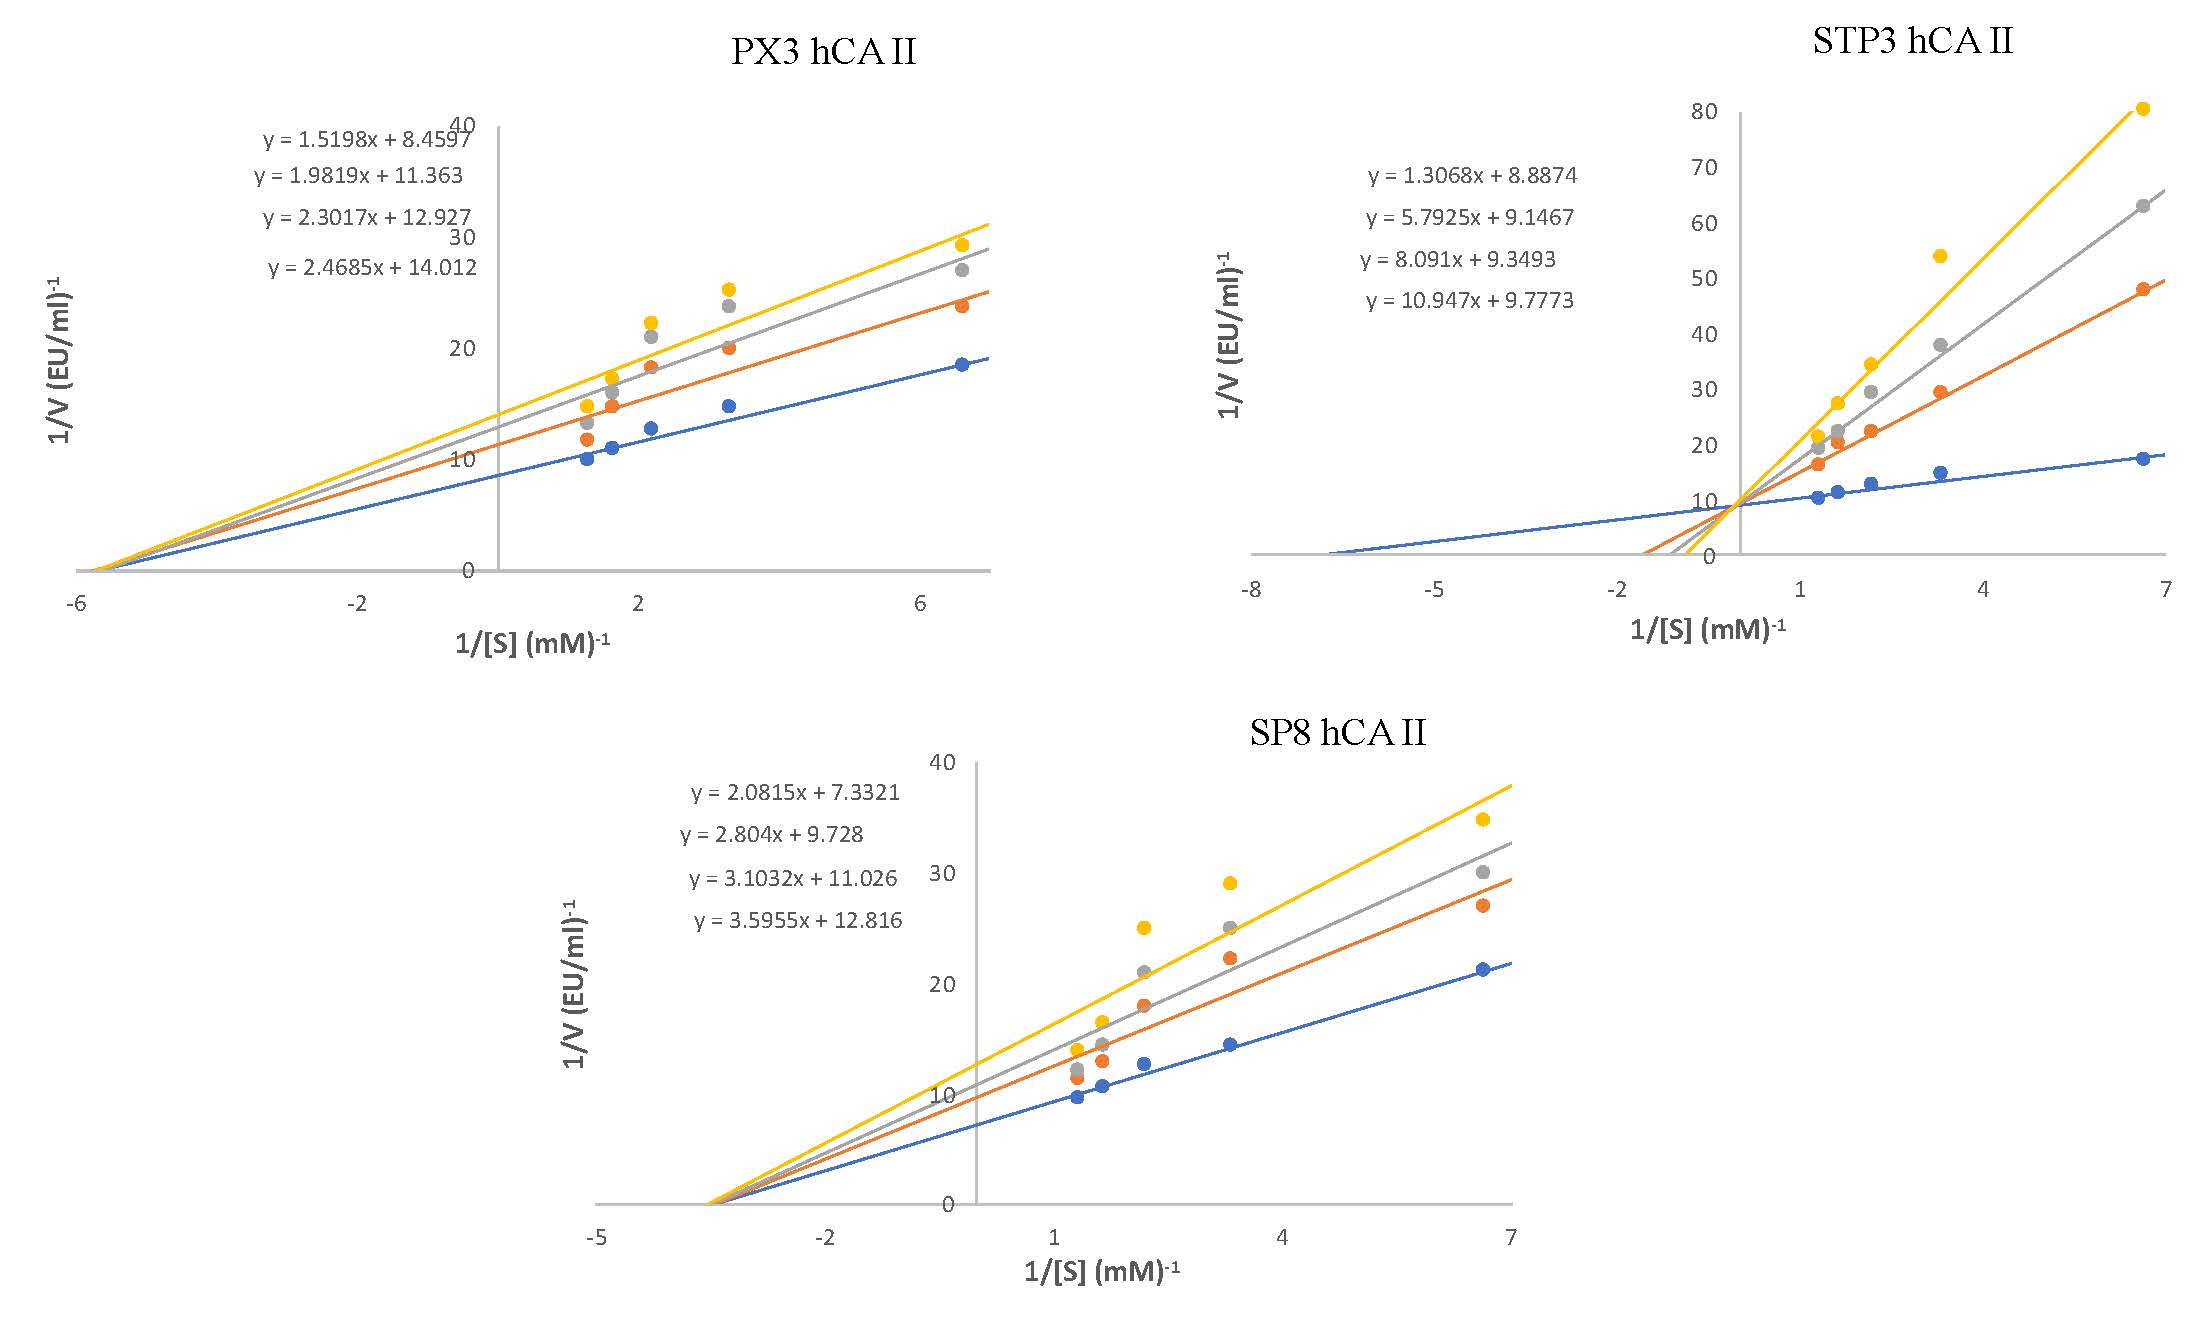
**


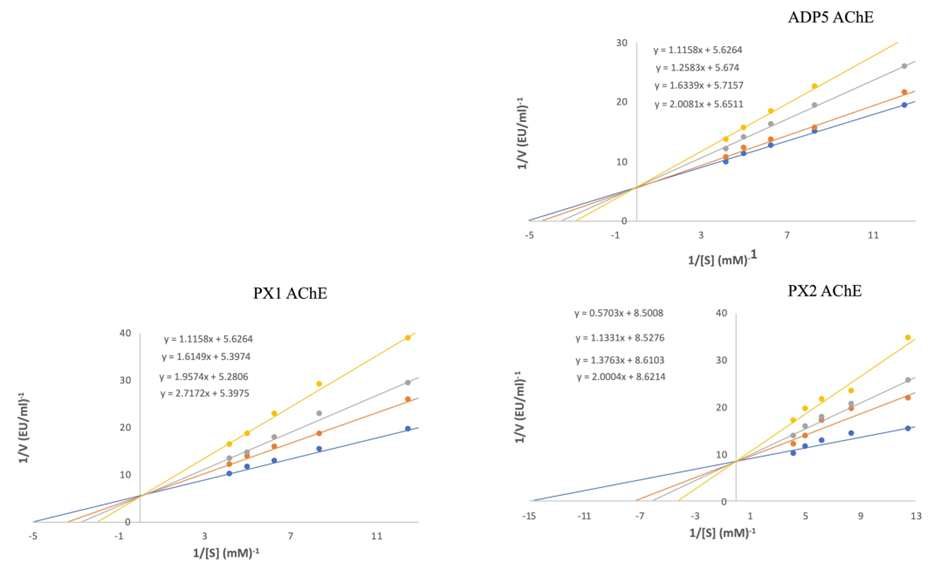


**
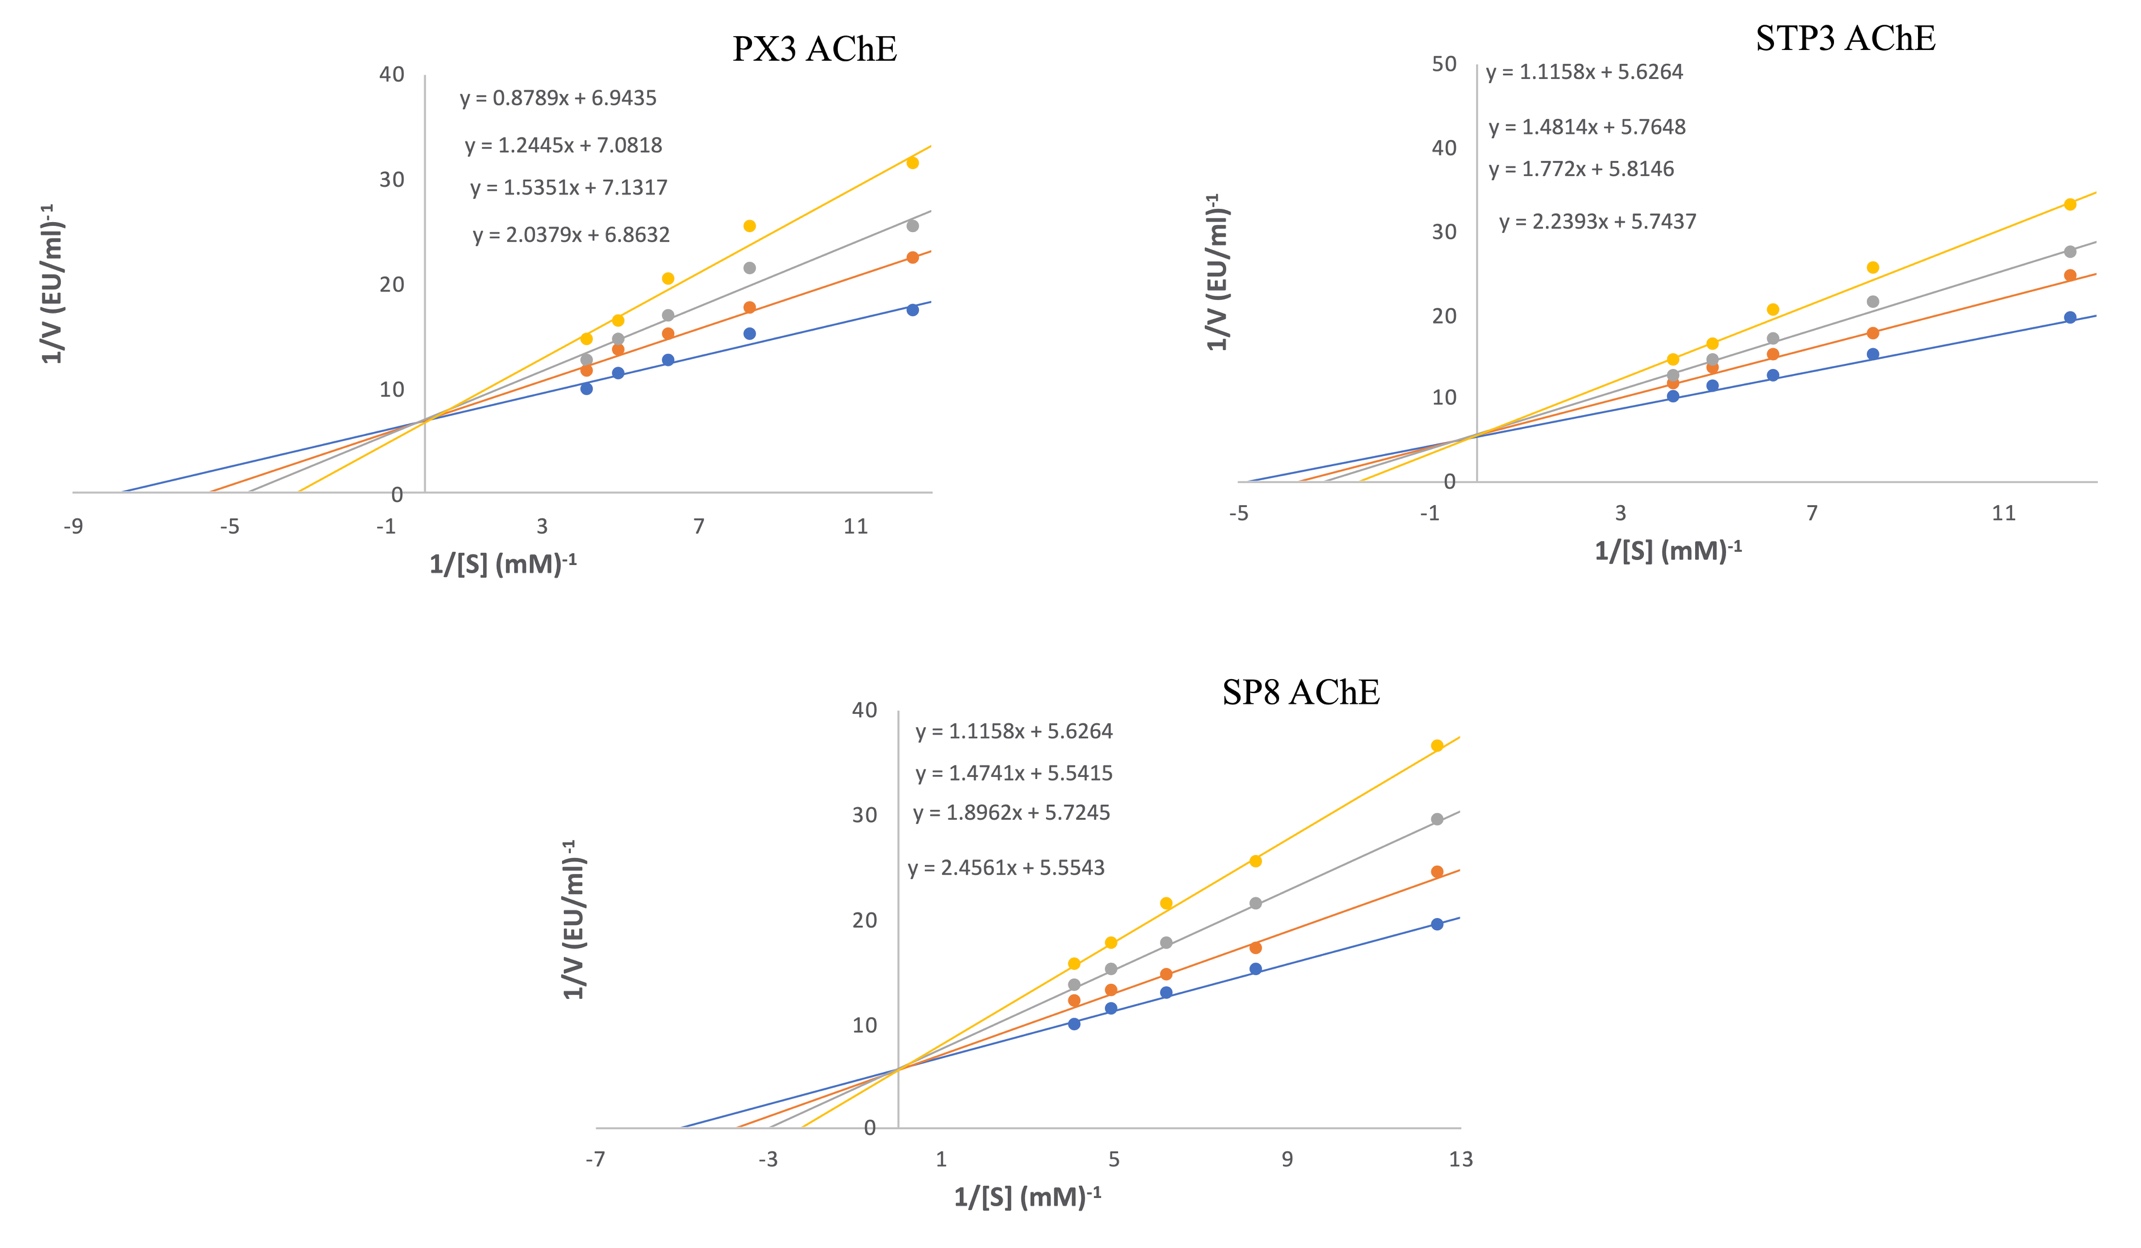
**
